# Supplementary material for: Multi-omics Reveals the Lifestyle of the Acidophilic, Mineral-Oxidizing Model Species Leptospirillum ferriphilumT
Source: PubMed Central journal article supplement (PMC5772234; doi:10.1128/aem.02091-17), 2018-01-17
Supplement: AEM.02091-17_zam003188291s1.pdf [file AEM.02091-17_zam003188291s1.pdf]

**Multi-omics reveal the lifestyle of acidophile, mineral-oxidizing model species  
*Leptospirillum ferriphilum*<sup>T</sup>**

**SUPPLEMENTAL MATERIAL**

Stephan Christel<sup>a</sup>, Malte Herold<sup>b</sup>, Sören Bellenberg<sup>c</sup>, Mohamed El Hajjami<sup>d</sup>, Antoine Buetti-Dinh<sup>e,f</sup>, Igor Pivkin<sup>e,f</sup>, Wolfgang Sand<sup>c,g,h</sup>, Paul Wilmes<sup>b</sup>, Ansgar Poetsch<sup>d,i</sup>, and Mark Dopson<sup>a,#</sup>

Centre for Ecology and Evolution in Microbial Model Systems, Linnaeus University, Kalmar, Sweden<sup>a</sup>; Luxembourg Centre for Systems Biomedicine, University of Luxembourg, Belvaux, Luxembourg<sup>b</sup>; Aquatic Biotechnology, University Duisburg-Essen, Essen, Germany<sup>c</sup>; Plant Biochemistry, Ruhr University Bochum, Germany<sup>d</sup>; Institute of Computational Science, Faculty of Informatics, Università della Svizzera Italiana, Lugano, Switzerland<sup>e</sup>; Swiss Institute of Bioinformatics, Lausanne, Switzerland<sup>f</sup>; College of Environmental Science and Engineering, Donghua University, Shanghai, PR China<sup>g</sup>; Mining Academy and Technical University Freiberg, Freiberg, Germany<sup>h</sup>; School of Biomedical and Healthcare Sciences, Plymouth University, UK<sup>i</sup>

#Address correspondence to Mark Dopson, [mark.dopson@lnu.se](mailto:mark.dopson@lnu.se)

S.C. and M.H. contributed equally to this work

**TABLE S1** Genes attributed to energy conservation identified in the *Leptospirillum ferriphilum*<sup>T</sup> DSM 14647 genome.

**TABLE S2** Carbon dioxide and nitrogen fixation genes identified in the *Leptospirillum ferriphilum*<sup>T</sup> DSM 14647 genome. Genes for other carbon dioxide fixation pathways (i.e. Calvin- Benson-Bassham (CBB) cycle, reductive acetyl-coenzyme A pathway, and 3-hydroxpropionate cycle) were either not identified or key genes required for the pathway were missing.

**TABLE S3** Genes attributed to adaptation to growth at low pH identified in the *Leptospirillum ferriphilum*<sup>T</sup> DSM 14647 genome. Primary proton pumps that export protons are listed in Table S1 while general stress response genes have only been included where a link to pH homeostasis has been reported.

**TABLE S4** Metal resistance genes identified in the *Leptospirillum ferriphilum*<sup>T</sup> DSM 14647 genome.

**TABLE S5** Oxidative stress response genes identified in the *Leptospirillum ferriphilum*<sup>T</sup> DSM 14647 genome.

**TABLE S6** Chemotaxis and motility genes identified in the *Leptospirillum ferriphilum*<sup>T</sup> DSM 14647 genome.

**TABLE S7** Quorum sensing and c-di-GMP genes identified in the *Leptospirillum ferriphilum*<sup>T</sup> DSM 14647 genome.

**TABLE S8** Biofilm formation genes identified in the *Leptospirillum ferriphilum*<sup>T</sup> DSM 14647 genome.

**FIG S1** Circoletto plot (Darzentas et al, 2010,. <http://tools.bat.infospire.org/circoletto/> 10/01/2015) showing a comparison between the new assembly contig1 (white) and the 18 contigs of the draft genome (24). Default settings were used and colored ribbons indicate relative alignment scores which in this case primarily reflect sequence length.

**FIG S2** Phylogenetic placement and relationship of *L. ferriphilum* strains. Shown are an evolutionary tree of the available strains(A), and a Venn diagram of orthologous gene clusters (B). The phylogenetic tree was constructed with CVTree3 (3) (<http://tlife.fudan.edu.cn/archaea/cvtree/cvtree3/> 30/10/2017) using amino acid sequences

with a K-tuple length of 6. Venn diagram was created with OrthoVenn (4) (<http://www.bioinfogenome.net/OrthoVenn/index.php> 30/10/2017) using protein sequences downloaded from NCBI as input. More detailed analysis as well as functional categories assigned to shared genes can be found under url <http://www.bioinfogenome.net/OrthoVenn/result.php?ID=d0faeba113424e41958bda82bce23f37>.

**FIG S3** Redox potential (A) and release of copper and iron (B) from chalcopyrite concentrate during bioleaching by *L. ferriphilum*<sup>T</sup> compared to a sterile control.

**REPORT S1** Details of the PacBio sequencing run.

**REPORT S2** Summary of CRISPR and phage association predictions for contig1 and contig2.

**Supplemental references**

**TABLE S1** Genes attributed to energy conservation identified in the *Leptospirillum ferriphilum*<sup>T</sup> DSM 14647 genome.

| Locus Tag                                           | Gene        | Predicted Function                                                        |
|-----------------------------------------------------|-------------|---------------------------------------------------------------------------|
| <b>NADH dehydrogenase</b>                           |             |                                                                           |
| LFTS_00278                                          |             | NAD(P)H-flavin reductase                                                  |
| LFTS_01220<br>LFTS_01821<br>LFTS_01828              | <i>ndhF</i> | NAD(P)H-quinone oxidoreductase subunit 5                                  |
| LFTS_00687                                          | <i>nuoA</i> | NADH-quinone oxidoreductase subunit A                                     |
| LFTS_00688                                          | <i>nuoB</i> | NADH-quinone oxidoreductase subunit B                                     |
| LFTS_00689                                          | <i>nuoC</i> | NADH-quinone oxidoreductase subunit C                                     |
| LFTS_00690                                          | <i>nuoD</i> | NADH-quinone oxidoreductase subunit D                                     |
| LFTS_00691                                          | <i>nuoE</i> | NADH-quinone oxidoreductase subunit E                                     |
| LFTS_01451<br>LFTS_01487<br>LFTS_02078              | <i>nuoF</i> | NADH-quinone oxidoreductase subunit F                                     |
| LFTS_00694                                          | <i>nuoH</i> | NADH-quinone oxidoreductase subunit H                                     |
| LFTS_00695                                          | <i>nuoI</i> | NADH-quinone oxidoreductase subunit I                                     |
| LFTS_00696                                          | <i>nuoJ</i> | NADH-quinone oxidoreductase subunit J                                     |
| LFTS_00697                                          | <i>nuoK</i> | NADH-quinone oxidoreductase subunit K                                     |
| LFTS_00698<br>LFTS_02316                            | <i>nuoL</i> | NADH-quinone oxidoreductase subunit L                                     |
| LFTS_00699<br>LFTS_02315                            | <i>nuoM</i> | NADH-quinone oxidoreductase subunit M                                     |
| LFTS_00700                                          | <i>nuoN</i> | NADH-quinone oxidoreductase subunit N                                     |
| <b>Succinate dehydrogenase / fumarate reductase</b> |             |                                                                           |
| LFTS_00585                                          | <i>sdhA</i> | Succinate dehydrogenase / fumarate reductase flavoprotein subunit         |
| <b>Cytochrome <i>bd</i></b>                         |             |                                                                           |
| LFTS_00439                                          | <i>cydA</i> | Cytochrome <i>d</i> ubiquinol oxidase subunit I                           |
| LFTS_00440                                          | <i>cydB</i> | Cytochrome <i>d</i> ubiquinol oxidase subunit II                          |
| LFTS_00441                                          | <i>ybgT</i> | Cytochrome <i>bd</i> -I terminal oxidase                                  |
| Cytochrome <i>b/c</i> <sub>1</sub>                  |             |                                                                           |
| LFTS_00821<br>LFTS_01943                            | <i>qcrA</i> | Menaquinol cytochrome <i>b</i> <sub>6</sub> complex iron-sulfur subunit 1 |
| LFTS_00822                                          | <i>qcrB</i> | Menaquinol-cytochrome <i>c</i> reductase cytochrome <i>b</i> subunit      |
| <b>Cytochrome <i>c</i></b>                          |             |                                                                           |
| LFTS_00766                                          |             | Cytochrome <i>c</i> mono- and diheme variants                             |
| LFTS_02381                                          | <i>ccsB</i> | Cytochrome <i>c</i> biogenesis protein                                    |
| LFTS_02382                                          | <i>resB</i> | Cytochrome <i>c</i> biogenesis protein                                    |
| LFTS_01388                                          |             | Cytochrome <i>c</i> <sub>551/552</sub>                                    |
| LFTS_00732                                          |             | Cytochrome <i>c</i> <sub>553</sub>                                        |

|                                                      |             |                                                                                                       |
|------------------------------------------------------|-------------|-------------------------------------------------------------------------------------------------------|
| LFTS_00740                                           |             |                                                                                                       |
| LFTS_00940                                           |             | Cytochrome <i>c</i> <sub>544</sub>                                                                    |
| LFTS_00730<br>LFTS_00731<br>LFTS_00741               |             | Cytochrome <i>c</i>                                                                                   |
| LFTS_02378                                           | <i>ccdA</i> | Cytochrome <i>c</i> biogenesis protein                                                                |
| <b>Cytochrome <i>cbb</i><sub>3</sub> oxidase</b>     |             |                                                                                                       |
| LFTS_01396<br>LFTS_01857<br>LFTS_01964               |             | Cytochrome <i>c</i> oxidase <i>cbb</i> <sub>3</sub> -type subunit I                                   |
| LFTS_01531<br>LFTS_01972                             |             | Cytochrome <i>c</i> oxidase <i>cbb</i> <sub>3</sub> -type subunit II                                  |
| LFTS_01351<br>LFTS_01930<br>LFTS_02094<br>LFTS_02276 |             | Cytochrome <i>c</i> oxidase <i>cbb</i> <sub>3</sub> -type subunit III                                 |
| <b>ATP synthase</b>                                  |             |                                                                                                       |
| LFTS_00066                                           | <i>atpA</i> | ATP synthase subunit alpha                                                                            |
| LFTS_00062                                           | <i>atpB</i> | ATP synthase subunit a                                                                                |
| LFTS_00069                                           | <i>atpC</i> | ATP synthase epsilon chain                                                                            |
| LFTS_00068                                           | <i>atpD</i> | ATP synthase subunit beta                                                                             |
| LFTS_00063                                           | <i>atpE</i> | ATP synthase subunit c                                                                                |
| LFTS_00064                                           | <i>atpF</i> | ATP synthase subunit b                                                                                |
| LFTS_00067                                           | <i>atpG</i> | ATP synthase gamma chain                                                                              |
| LFTS_00065                                           | <i>atpH</i> | ATP synthase subunit delta                                                                            |
| LFTS_00061                                           |             | Putative F <sub>0</sub> F <sub>1</sub> -ATPase subunit Ca <sup>2+</sup> /Mg <sup>2+</sup> transporter |

**TABLE S2** Carbon dioxide and nitrogen fixation genes identified in the *Leptospirillum ferriphilum*<sup>T</sup> DSM 14647 genome. Genes for other carbon dioxide fixation pathways (i.e. Calvin-Bassham-Benson (CBB) cycle, reductive acetyl-coenzyme A pathway, and 3-hydroxypropionate cycle) were either not identified or key genes required for the pathway were missing.

| Locus Tag                                                  | Gene         | Predicted Function                                                    |
|------------------------------------------------------------|--------------|-----------------------------------------------------------------------|
| <b>Reductive TCA cycle carbon dioxide fixation</b>         |              |                                                                       |
| ROKKA_02486                                                |              | Phosphoenolpyruvate carboxylase                                       |
| LFTS_00876                                                 | <i>mdh2</i>  | Malate dehydrogenase (NAD)                                            |
| LFTS_01556                                                 | <i>fumC</i>  | Fumarase class II                                                     |
| LFTS_00585                                                 |              | Succinate dehydrogenase / fumarate reductase flavoprotein subunit     |
| LFTS_00579                                                 | <i>sucD</i>  | Succinyl-CoA synthetase alpha subunit                                 |
| LFTS_00587                                                 |              |                                                                       |
| LFTS_00586                                                 | <i>sucC</i>  | Succinyl-CoA synthetase beta subunit                                  |
| LFTS_02458                                                 | <i>forA2</i> | pyruvate ferredoxin oxidoreductase alpha subunit                      |
| LFTS_02457                                                 | <i>forB2</i> | pyruvate ferredoxin oxidoreductase beta subunit                       |
| LFTS_02451                                                 | <i>forG1</i> | pyruvate ferredoxin oxidoreductase gamma subunit                      |
| LFTS_02456                                                 | <i>forG2</i> | pyruvate ferredoxin oxidoreductase gamma subunit                      |
| LFTS_00965                                                 |              | Isocitrate dehydrogenase (NAD <sup>+</sup> )                          |
| LFTS_00966                                                 |              | Putative isocitrate dehydrogenase (NADP)                              |
| LFTS_00581                                                 |              | Aconitase                                                             |
| LFTS_00582                                                 |              | Citryl-CoA lyase                                                      |
| LFTS_00578                                                 |              | Citryl-CoA synthetase large subunit                                   |
| LFTS_02453                                                 | <i>forA</i>  | Pyruvate ferredoxin oxidoreductase alpha subunit                      |
| LFTS_02452                                                 | <i>forB</i>  | Pyruvate ferredoxin oxidoreductase beta subunit                       |
| LFTS_02455                                                 | <i>forD</i>  | Pyruvate:ferredoxin oxidoreductase delta subunit                      |
| LFTS_02450                                                 |              | Pyruvate ferredoxin oxidoreductase epsilon subunit                    |
| LFTS_02143                                                 | <i>ppsA</i>  | Phosphoenolpyruvate synthase                                          |
| <b>Calvin-Benson-Bassham cycle carbon dioxide fixation</b> |              |                                                                       |
| LFTS_02524                                                 | <i>rbcl</i>  | Ribulose-bisphosphate carboxylase large chain                         |
| <b>Nitrate/nitrite regulation</b>                          |              |                                                                       |
| LFTS_00042                                                 | <i>ntrX</i>  | NtrC family, nitrogen regulation response regulator                   |
| LFTS_01867                                                 | <i>glnG</i>  | NtrC family nitrogen regulation response regulator                    |
| LFTS_00534                                                 |              |                                                                       |
| LFTS_01618                                                 |              | LysR family transcriptional regulator nitrogen assimilation regulator |
| LFTS_00311                                                 |              | Nitrogen regulatory protein P-II family protein                       |
| LFTS_00704                                                 |              |                                                                       |
| LFTS_01184                                                 |              |                                                                       |
| LFTS_01185                                                 |              |                                                                       |
| LFTS_01200                                                 |              |                                                                       |

|                                                        |             |                                                                |
|--------------------------------------------------------|-------------|----------------------------------------------------------------|
| LFTS_01203                                             |             |                                                                |
| LFTS_02313                                             |             |                                                                |
| LFTS_02317                                             |             | Nif-specific regulatory protein                                |
| <b>Nitrite uptake &amp; assimilation to ammonia</b>    |             |                                                                |
| LFTS_01202                                             | <i>nasA</i> | MFS transporter NNP family nitrate/nitrite transporter         |
| LFTS_01201                                             | <i>nirB</i> | Nitrite reductase large subunit                                |
| LFTS_02431                                             | <i>nirD</i> | Nitrite reductase small subunit                                |
| <b>Nitrogenase genes</b>                               |             |                                                                |
| LFTS_01957                                             | <i>nifA</i> | Nif-specific regulatory protein                                |
| LFTS_01169                                             | <i>nifB</i> | FeMo cofactor biosynthesis protein                             |
| LFTS_01163                                             | <i>nifD</i> | Mo-nitrogenase MoFe protein alpha subunit                      |
| LFTS_01165                                             | <i>nifE</i> | Nitrogenase molybdenum-cofactor synthesis protein NifE         |
| LFTS_01162                                             | <i>nifH</i> | Nitrogenase iron protein                                       |
| LFTS_01164                                             | <i>nifK</i> | Mo-nitrogenase MoFe protein beta subunit                       |
| LFTS_01166                                             | <i>nifN</i> | Nitrogenase iron-molybdenum cofactor biosynthesis protein NifN |
| LFTS_00421                                             |             | Cysteine desulfurase                                           |
| LFTS_01174                                             |             |                                                                |
| LFTS_01179                                             | <i>nifT</i> | Nitrogen fixation protein                                      |
| LFTS_00420                                             | <i>nifU</i> | Scaffold protein for iron-sulfur cluster assembly              |
| LFTS_01178                                             |             |                                                                |
| LFTS_01167                                             | <i>nifX</i> | Nitrogenase, MoFe protein                                      |
| LFTS_01177                                             | <i>nifZ</i> | Cysteine desulfurase                                           |
| LFTS_01168                                             |             | Putative nitrogen fixation protein                             |
| LFTS_01182                                             |             | Ferredoxin <i>nif</i> -specific                                |
| LFTS_01183                                             |             | Nitrogenase-stabilizing/protective protein                     |
| <b>Ammonia &amp; glutamate conversion to glutamine</b> |             |                                                                |
| LFTS_00312                                             | <i>amt</i>  | Ammonium transporter                                           |
| LFTS_00310                                             | <i>nrgA</i> | Ammonium transporter                                           |
| LFTS_00703                                             |             |                                                                |
| LFTS_01907                                             | <i>glnA</i> | Glutamine synthetase                                           |

**TABLE S3** Genes attributed to adaptation to growth at low pH identified in the *Leptospirillum ferriphilum*<sup>T</sup> DSM 14647 genome. Primary proton pumps that export protons are listed in Supplemental File 2 while general stress response genes have only been included where a link to pH homeostasis has been reported.

| Locus Tag                                                            | Gene        | Predicted Function                                           |
|----------------------------------------------------------------------|-------------|--------------------------------------------------------------|
| <b>Role of potassium in the internal positive membrane potential</b> |             |                                                              |
| LFTS_00452                                                           | <i>kdpC</i> | K <sup>+</sup> -transporting ATPase C chain                  |
| LFTS_00453                                                           | <i>kdpA</i> | K <sup>+</sup> -transporting ATPase A chain                  |
| LFTS_00454                                                           | <i>kdpB</i> | K <sup>+</sup> -transporting ATPase B chain                  |
| LFTS_00075                                                           | <i>kdpD</i> | Sensor protein gene                                          |
| LFTS_00459                                                           |             |                                                              |
| LFTS_02015                                                           | <i>kch</i>  | Voltage-gated potassium channel                              |
| LFTS_02359                                                           | <i>trkA</i> | Voltage-gated potassium channel                              |
| LFTS_00343                                                           |             | Ca <sup>2+</sup> -Na <sup>+</sup> /H <sup>+</sup> antiporter |
| LFTS_01531                                                           | <i>chaC</i> | Cation transport protein                                     |
| LFTS_00392                                                           |             | Na <sup>+</sup> /H <sup>+</sup> antiporter CPA family        |
| LFTS_02006                                                           |             | Monovalent cation:H <sup>+</sup> antiporter CPA1 family      |
| LFTS_02015                                                           |             |                                                              |
| <b>Proton consuming reactions</b>                                    |             |                                                              |
| LFTS_00495                                                           |             | Glutamate decarboxylase                                      |
| LFTS_00855                                                           | <i>ldcC</i> | Arginine decarboxylase                                       |
| LFTS_02102                                                           | <i>panD</i> | L-aspartate 1-decarboxylase                                  |
| LFTS_00030                                                           |             | Carbonic anhydrase                                           |
| LFTS_00296                                                           |             |                                                              |
| <b>Spermidine</b>                                                    |             |                                                              |
| LFTS_00856                                                           | <i>speE</i> | Spermidine synthase                                          |
| LFTS_00857                                                           | <i>speH</i> | S-adenosylmethionine decarboxylase                           |
| LFTS_01989                                                           |             | Glutathionylspermidine synthase preATP-grasp                 |
| <b>Chaperones</b>                                                    |             |                                                              |
| LFTS_00851                                                           | <i>groL</i> | Chaperonin GroEL                                             |
| LFTS_00258                                                           | <i>clpB</i> | ClpB protein                                                 |
| LFTS_00785                                                           | <i>clpC</i> | ATP-dependent Clp protease                                   |
| LFTS_00927                                                           |             |                                                              |
| LFTS_00839                                                           |             | Clp protease                                                 |
| LFTS_00948                                                           |             | Molecular chaperone DnaK                                     |



**TABLE S4** Metal resistance genes identified in the *Leptospirillum ferriphilum*<sup>T</sup> DSM 14647 genome.

| Locus Tag                             | Gene        | Predicted Function                                       |
|---------------------------------------|-------------|----------------------------------------------------------|
| <b>Arsenic resistance</b>             |             |                                                          |
| LFTS_00324                            | <i>arsR</i> | As transcriptional repressor                             |
| LFTS_00753                            | <i>arsB</i> | As efflux membrane subunit                               |
| LFTS_00754                            | <i>arsC</i> | Arsenate reductase                                       |
| <b>Copper resistance</b>              |             |                                                          |
| LFTS_02050                            |             | Copper-exporting P-type ATPase                           |
| LFTS_00313                            |             |                                                          |
| LFTS_00752                            | <i>copZ</i> | Periplasmic copper-binding                               |
| LFTS_00684                            | <i>cutA</i> | Cu(II) binding protein                                   |
| <b>Copper/silver resistance</b>       |             |                                                          |
| LFTS_00919                            | <i>cusA</i> | Cu(I)/Ag(I) efflux system membrane protein               |
| LFTS_00166                            | <i>cusB</i> | Cu(I)/Ag(I) membrane fusion protein                      |
| LFTS_02435                            |             |                                                          |
| LFTS_00920                            |             |                                                          |
| LFTS_01521                            |             |                                                          |
| LFTS_02071                            | <i>cusC</i> | Cu(I)/Ag(I) efflux system, outer membrane component      |
| LFTS_00918                            | <i>cusF</i> | Cu(I)/Ag(I) efflux protein                               |
| LFTS_02048                            |             |                                                          |
| <b>Cadmium/cobalt/zinc resistance</b> |             |                                                          |
| LFTS_00167                            | <i>czcA</i> | Cd/Co/Zn H <sup>+</sup> -K <sup>+</sup> efflux           |
| LFTS_01520                            |             |                                                          |
| LFTS_01619                            |             |                                                          |
| LFTS_02037                            |             |                                                          |
| LFTS_02038                            | <i>czcB</i> | RND family efflux transporter MFP subunit                |
| LFTS_00326                            |             |                                                          |
| LFTS_01620                            |             |                                                          |
| LFTS_02419                            |             |                                                          |
| LFTS_02423                            | <i>czcC</i> | Outer membrane protein cobalt-zinc-cadmium efflux system |
| LFTS_02039                            |             |                                                          |
| LFTS_01521                            |             |                                                          |
| LFTS_00665                            | <i>czcD</i> | Cation diffusion facilitator family transporter          |
| LFTS_02043                            |             | Cobalt-zinc-cadmium efflux system protein                |
| <b>Mercury resistance</b>             |             |                                                          |
| LFTS_00560                            | <i>merR</i> | Mercuric resistance operon regulatory protein            |
| LFTS_00559                            | <i>merA</i> | Mercuric reductase                                       |
| LFTS_01909                            |             |                                                          |
| LFTS_01157                            |             |                                                          |
| LFTS_01156                            | <i>merC</i> | Resistance protein                                       |
| LFTS_00558                            |             | Mercuric ion transport protein                           |
| <b>Metal tolerance</b>                |             |                                                          |
| LFTS_00076                            |             | Heavy-metal resistance protein                           |

|            |  |  |
|------------|--|--|
| LFTS_00755 |  |  |
| LFTS_01059 |  |  |
| LFTS_02594 |  |  |

**TABLE S5** Oxidative stress response genes identified in the *Leptospirillum ferriphilum*<sup>T</sup> DSM 14647 genome.

| Locus Tag  | Gene              | Predicted Function                                                         |
|------------|-------------------|----------------------------------------------------------------------------|
| LFTS_00588 | <i>ahpC</i>       | Peroxiredoxin (alkyl hydroperoxide reductase subunit C)                    |
| LFTS_02121 |                   |                                                                            |
| LFTS_02379 | <i>ccmG, dsbE</i> | Peroxiredoxin                                                              |
| LFTS_02380 |                   |                                                                            |
| LFTS_01366 |                   |                                                                            |
| LFTS_00334 | <i>bcp</i>        | Thiol peroxiredoxin Q/BCP                                                  |
| LFTS_00463 |                   |                                                                            |
| LFTS_00141 |                   | Peroxiredoxin family protein                                               |
| LFTS_00956 |                   |                                                                            |
| LFTS_00464 | <i>efeB</i>       | Putative iron-dependent peroxidase                                         |
| LFTS_02122 |                   | Cytochrome c peroxidase                                                    |
| LFTS_02123 | <i>perR</i>       | Fur family transcriptional regulator peroxide stress response regulator    |
| LFTS_00101 |                   |                                                                            |
| LFTS_00834 |                   |                                                                            |
| LFTS_00361 |                   | Rubrerythrin                                                               |
| LFTS_01356 | <i>gpmM</i>       | 2,3-bisphosphoglycerate-independent phosphoglycerate mutase                |
| LFTS_00965 | <i>icd</i>        | isocitrate dehydrogenase (NAD)<br>Putative isocitrate dehydrogenase (NADP) |
| LFTS_00966 |                   |                                                                            |
| LFTS_00293 | <i>degP</i>       | Serine protease Do                                                         |
| LFTS_00852 | <i>trx</i>        | Thioredoxin 1                                                              |
| LFTS_00318 |                   | Thioredoxin 2                                                              |
| LFTS_02417 | <i>trxB</i>       | Thioredoxin reductase (NADPH)                                              |
| LFTS_00473 |                   | Glutaredoxin                                                               |
| LFTS_00823 |                   |                                                                            |
| LFTS_01556 | <i>fumC</i>       | Fumarase C                                                                 |
| LFTS_00831 |                   | Thiol-disulfide isomerase or thioredoxin                                   |
| LFTS_00175 |                   |                                                                            |
| LFTS_01366 |                   |                                                                            |
| LFTS_02519 |                   |                                                                            |
| LFTS_01154 |                   | Thioredoxin domain-containing protein                                      |
| LFTS_01773 |                   | putative peroxiredoxin                                                     |
| LFTS_00737 | <i>ybbN</i>       | ybbN; DnaK co-chaperone, thioredoxin-like protein                          |
| LFTS_00348 |                   | L-ectoine synthase                                                         |
| LFTS_00759 |                   | High-affinity iron transporter                                             |
| LFTS_00856 |                   | Spermidine synthase                                                        |
| LFTS_00857 |                   | S-adenosylmethionine decarboxylase                                         |

|            |  |                                              |
|------------|--|----------------------------------------------|
| LFTS_00955 |  | Cobalamin-5'-phosphate synthase              |
| LFTS_01989 |  | Glutathionylspermidine synthase preATP-grasp |

**TABLE S6** Chemotaxis and motility genes identified in the *Leptospirillum ferriphilum*<sup>T</sup> DSM 14647 genome.

| Locus Tag                                                                                      | Gene             | Predicted Function                                                          |
|------------------------------------------------------------------------------------------------|------------------|-----------------------------------------------------------------------------|
| <b>Chemotaxis</b>                                                                              |                  |                                                                             |
| LFTS_00183<br>LFTS_00227<br>LFTS_01445<br>LFTS_01455<br>LFTS_01548<br>LFTS_01731<br>LFTS_02147 |                  | methyl-accepting chemotaxis protein                                         |
| LFTS_00223                                                                                     | <i>cheR</i>      | chemotaxis protein methyltransferase                                        |
| LFTS_00224                                                                                     | <i>cheY3</i>     | two-component systemchemotaxis familyresponse regulator                     |
| LFTS_00225                                                                                     | <i>cheA</i>      | two-component systemchemotaxis familysensor kinase                          |
| LFTS_00226                                                                                     | <i>cheB</i>      | two-component systemchemotaxis familyresponse regulator                     |
| LFTS_00228                                                                                     | <i>cheW</i>      | purine-binding chemotaxis protein                                           |
| LFTS_00229                                                                                     | <i>motA</i>      | chemotaxis protein                                                          |
| LFTS_00230                                                                                     | <i>motB1</i>     | chemotaxis protein                                                          |
| LFTS_00710                                                                                     | <i>cheZ</i>      | chemotaxis protein                                                          |
| LFTS_00799                                                                                     | <i>cheV</i>      | two-component systemchemotaxis familyresponse regulator                     |
| LFTS_02318                                                                                     | <i>fliM</i>      | flagellar motor switch protein                                              |
| <b>Motility</b>                                                                                |                  |                                                                             |
| LFTS_00196                                                                                     | <i>fleQ</i>      | sigma-54 specific transcriptional regulator, flagellar regulatory protein A |
| LFTS_00198                                                                                     | <i>f1rB</i>      | two-component systemsensor histidine kinase                                 |
| LFTS_00199                                                                                     | <i>f1rC</i>      | two-component systemresponse regulator                                      |
| LFTS_00200                                                                                     | <i>f1gB</i>      | flagellar basal-body rod protein                                            |
| LFTS_00201                                                                                     | <i>f1gC</i>      | flagellar basal-body rod protein                                            |
| LFTS_00202                                                                                     | <i>f1iE</i>      | flagellar hook-basal body complex protein                                   |
| LFTS_00203                                                                                     | <i>f1iF</i>      | flagellar M-ring protein                                                    |
| LFTS_00204                                                                                     | <i>f1iG</i>      | flagellar motor switch protein                                              |
| LFTS_00205                                                                                     | <i>f1iH</i>      | putative flagellar assembly protein                                         |
| LFTS_00206                                                                                     | <i>f1iI/YscN</i> | type III secretion system ATPase                                            |
| LFTS_00207                                                                                     | <i>f1iJ</i>      | flagellar export protein                                                    |
| LFTS_00209                                                                                     | <i>f1iK</i>      | hook-length control protein                                                 |
| LFTS_00210                                                                                     | <i>f1gD</i>      | flagellar basal-body rod modification protein                               |
| LFTS_00211                                                                                     | <i>f1gE</i>      | flagellar hook protein                                                      |
| LFTS_00212                                                                                     | <i>f1iL</i>      | flagellar protein                                                           |
| LFTS_00213                                                                                     | <i>f1iN/f1iY</i> | flagellar motor switch protein                                              |

|            |                  |                                                  |
|------------|------------------|--------------------------------------------------|
| LFTS_00214 | <i>fliO/fliY</i> | flagellar protein                                |
| LFTS_00215 | <i>fliP</i>      | flagellar biosynthetic protein                   |
| LFTS_00216 | <i>fliQ</i>      | flagellar biosynthetic protein                   |
| LFTS_00217 | <i>fliR</i>      | flagellar biosynthetic protein                   |
| LFTS_00218 | <i>fliB</i>      | flagellar biosynthetic protein                   |
| LFTS_00219 | <i>fliA</i>      | RNA polymerase sigma factor for flagellar operon |
| LFTS_00220 | <i>fliC</i>      | flagellin                                        |
| LFTS_00221 | <i>fliD</i>      | flagellar hook-associated protein 2              |
| LFTS_00222 | <i>fliE</i>      | flagellar hook-associated protein 1              |
| LFTS_02334 | <i>fliS</i>      | flagellar protein                                |
| LFTS_02335 | <i>fliD</i>      | flagellar hook-associated protein 2              |
| LFTS_02336 | <i>fliC1</i>     | flagellin                                        |
| LFTS_02337 | <i>fliW</i>      | flagellar assembly factor                        |
| LFTS_02339 | <i>flgL</i>      | flagellar hook-associated protein                |
| LFTS_02340 | <i>flgK</i>      | flagellar hook-associated protein                |
| LFTS_02341 | <i>flgN</i>      | export chaperone for FlgK and FlgL               |
| LFTS_02342 | <i>flgM</i>      | anti-sigma-28 factor                             |
| LFTS_02343 | <i>fliC2</i>     | flagellin                                        |
| LFTS_02344 | <i>flgJ</i>      | flagellar protein                                |
| LFTS_02345 | <i>flgI</i>      | flagellar P-ring protein precursor               |
| LFTS_02346 | <i>flgH</i>      | flagellar L-ring protein precursor               |
| LFTS_02347 | <i>flgA</i>      | flagella basal body P-ring formation protein     |
| LFTS_02348 | <i>flgG</i>      | flagellar basal-body rod protein                 |
| LFTS_02349 | <i>flgE</i>      | flagellar basal-body rod protein                 |

**TABLE S7** Quorum sensing and c-di-GMP genes identified in the *Leptospirillum ferriphilum*<sup>T</sup> DSM 14647 genome.

| Locus Tag                                                                                      | Gene             | Predicted Function                                                                                                   |
|------------------------------------------------------------------------------------------------|------------------|----------------------------------------------------------------------------------------------------------------------|
| <b>Quorum sensing</b>                                                                          |                  |                                                                                                                      |
| LFTS_00514                                                                                     | <i>rpfF</i>      | DSF synthase                                                                                                         |
| LFTS_00515                                                                                     | <i>rpfC</i>      | Hpt domain-containing protein                                                                                        |
| LFTS_00516                                                                                     | <i>rpfC</i>      | Signal transduction histidine kinase                                                                                 |
| LFTS_00517                                                                                     | <i>rpfG</i>      | Two-component system response regulator                                                                              |
| LFTS_00133                                                                                     |                  | Regulatory protein luxR family                                                                                       |
| LFTS_00589                                                                                     | <i>sdiA</i>      | Quorum-sensing transcriptional activator; LuxR family transcriptional regulator                                      |
| LFTS_01215                                                                                     |                  | Autoinducer binding domain                                                                                           |
| LFTS_01241                                                                                     | <i>sdiA</i>      | LuxR family transcriptional regulator                                                                                |
| <b>c-di-GMP specific phosphodiesterases (EAL domain-containing proteins)</b>                   |                  |                                                                                                                      |
| LFTS_00034<br>LFTS_00314                                                                       | <i>gmr, csgD</i> | EAL domain, c-di-GMP-specific phosphodiesterase class I (or its enzymatically inactive variant)                      |
| <b>Genes encoding proteins with EAL and GGDEF domains</b>                                      |                  |                                                                                                                      |
| LFTS_00089                                                                                     |                  | Diguanylate cyclase / phosphodiesterase with GAF sensor                                                              |
| LFTS_00405                                                                                     |                  | PAS/PAC and Chase sensor-containing diguanylate cyclase/phosphodiesterase                                            |
| LFTS_00479<br>LFTS_00575<br>LFTS_00733                                                         |                  | Signalling repeat/GGDEF domain/EAL domain protein                                                                    |
| LFTS_00493<br>LFTS_00663<br>LFTS_00709<br>LFTS_01908                                           |                  | Diguanylate cyclase/phosphodiesterase with PAS/PAC sensor(S)                                                         |
| LFTS_00968                                                                                     |                  | Diguanylate cyclase/phosphodiesterase with GAF sensor<br>Diguanylate cyclase/phosphodiesterase (GGDEF & EAL domains) |
| LFTS_01006                                                                                     |                  | Diguanylate cyclase/phosphodiesterase (GGDEF & EAL domains)                                                          |
| LFTS_01595                                                                                     |                  | Response regulator receiver modulated diguanylate cyclase/phosphodiesterase with PAS/PAC sensor(S)                   |
| <b>Putative diguanylate cyclases (GGDEF domain-containing proteins)</b>                        |                  |                                                                                                                      |
| LFTS_00174<br>LFTS_00501<br>LFTS_00511<br>LFTS_00714<br>LFTS_00872<br>LFTS_01061<br>LFTS_02076 | <i>dosC</i>      | Diguanylate cyclase; cold- and stationary phase-induced oxygen-dependent biofilm regulator                           |
| LFTS_00029<br>LFTS_00503<br>LFTS_00562<br>LFTS_00858<br>LFTS_01493                             |                  | GGDEF family protein, diguanylate cyclase                                                                            |

|                                        |             |                                                                                           |
|----------------------------------------|-------------|-------------------------------------------------------------------------------------------|
| LFTS_01845<br>LFTS_02591               |             |                                                                                           |
| LFTS_00306<br>LFTS_01577               |             | Response regulator receiver modulated diguanylate cyclase                                 |
| LFTS_00510                             |             | PAS domain S-box-containing protein/diguanylate cyclase (GGDEF) domain-containing protein |
| <b>c-di-GMP effector proteins</b>      |             |                                                                                           |
| LFTS_00568<br>LFTS_00573<br>LFTS_02308 |             | PilZ domain-containing protein                                                            |
| LFTS_00504                             | <i>popA</i> | two-component system, cell cycle response regulator                                       |



**TABLE S8** Biofilm formation genes identified in the *Leptospirillum ferriphilum*<sup>T</sup> DSM 14647 genome.

| Locus Tag                           | Gene                           | Predicted Function                                                                           |
|-------------------------------------|--------------------------------|----------------------------------------------------------------------------------------------|
| <b>Cellulose production</b>         |                                |                                                                                              |
| LFTS_00736                          | <i>bcsQ</i>                    | Cellulose biosynthesis protein                                                               |
| LFTS_00738                          | <i>bcsB</i>                    | Cellulose synthase subunit                                                                   |
| LFTS_00739                          | <i>bcsA</i>                    | Cellulose synthase (UDP-forming)                                                             |
| LFTS_02306                          | <i>rexA</i>                    | Cellulase family 8, oligosaccharide reducing-end xylanase                                    |
| LFTS_02307                          | <i>bcsB</i>                    | Cellulose synthase subunit                                                                   |
| LFTS_02308                          | <i>bcsA</i>                    | Cellulose synthase (UDP-forming) PilZ domain-containing protein                              |
| LFTS_02310                          | <i>bcsA</i>                    | Cellulose synthase (UDP-forming)                                                             |
| LFTS_02311                          | <i>bcsC</i>                    | Probable cellulose synthase operon protein C                                                 |
| <b>putative pel operon</b>          |                                |                                                                                              |
| LFTS_01242                          | <i>pelG</i>                    | Putative membrane protein                                                                    |
| LFTS_01243                          | <i>pelF</i>                    | Pellicle/biofilm biosynthesis glycosyltransferase                                            |
| LFTS_01244                          | <i>mpeU</i><br>( <i>pelE</i> ) | Bilin biosynthesis protein                                                                   |
| LFTS_01245                          | <i>pelD</i>                    | Response regulator receiver modulated diguanylate cyclase                                    |
| LFTS_01246                          |                                | Glycoside-hydrolase family GH114                                                             |
| LFTS_01247                          | <i>lpoB</i><br>( <i>pelC</i> ) | Outer membrane lipoprotein                                                                   |
| LFTS_01248                          |                                | Putative PEP-CTERM system tetratricopeptide repeat lipoprotein                               |
| LFTS_01249                          |                                | Putative PEP-CTERM system tetratricopeptide repeat lipoprotein                               |
| LFTS_01250                          | <i>pelA</i>                    | Putative membrane protein-like protein, polysaccharide deacetylase                           |
| <b>Lipopolysaccharide synthesis</b> |                                |                                                                                              |
| LFTS_00080                          | <i>lkxH</i>                    | UDP-2,3-diacylglucosamine pyrophosphatase                                                    |
| LFTS_00081                          |                                | 1,2-diacylglycerol 3-beta-galactosyltransferase                                              |
| LFTS_01292                          | <i>lpxD</i>                    | UDP-3-O-[3-hydroxymyristoyl] glucosamine N-acyltransferase                                   |
| LFTS_01293                          | <i>fabZ</i>                    | 3R-hydroxymyristoyl-[acyl-carrier-protein] dehydratase                                       |
| LFTS_01294                          | <i>lpxA</i>                    | UDP-N-acetylglucosamine O-acyltransferase                                                    |
| LFTS_01297                          | <i>lpxB</i>                    | Lipid-A-disaccharide synthase                                                                |
| LFTS_01299                          | <i>msbA</i>                    | Fused lipid transporter subunits of ABC superfamily: membrane component/ATP-binding cassette |
| LFTS_01300                          | <i>kdtA</i> ,<br><i>waaA</i>   | 3-deoxy-D-manno-octulosonic-acid transferase                                                 |
| LFTS_01301                          | <i>lpxK</i>                    | Lipid A tetraacyldisaccharide 4'-kinase                                                      |
| LFTS_01302                          | <i>lpxL</i>                    | Lauryl-acyl carrier protein (ACP)-dependent                                                  |
| LFTS_01303                          | <i>rfaF</i>                    | ADP-heptose:LPS heptosyltransferase II                                                       |
| LFTS_01304                          | <i>rfaC</i>                    | ADP-heptose:LPS heptosyl transferase I                                                       |
| LFTS_01305                          | <i>rfaC</i>                    | ADP-heptose:LPS heptosyl transferase I                                                       |

|                                        |                     |                                                                                                                    |
|----------------------------------------|---------------------|--------------------------------------------------------------------------------------------------------------------|
| LFTS_01306                             | <i>kdtX</i>         | Lipopolysaccharide core biosynthesis glycosyl transferase                                                          |
| LFTS_01307                             | <i>wbdM</i>         | Glycosyltransferase                                                                                                |
| LFTS_01298<br>LFTS_01308<br>LFTS_01310 |                     | Glycosyl transferase family protein                                                                                |
| LFTS_01311                             | <i>rfaF</i>         | ADP-heptose:LPS heptosyltransferase II                                                                             |
| LFTS_01312                             | <i>gmhB</i>         | D,D-heptose 1,7-bisphosphate phosphatase                                                                           |
| LFTS_01314                             | <i>rfaF</i>         | ADP-heptose:LPS heptosyltransferase II                                                                             |
| LFTS_01315                             | <i>rfaQ</i>         | Lipopolysaccharide core biosynthesis protein                                                                       |
| LFTS_01316                             | <i>pgaB</i>         | Biofilm adhesin polysaccharide PGA export lipoprotein with a polysaccharide deacetylase activity needed for export |
| LFTS_01317                             | <i>pimB</i>         | Group 1 glycosyl transferase                                                                                       |
| LFTS_01323                             | <i>rfaL</i>         | O-antigen ligase                                                                                                   |
| LFTS_01328                             | <i>arnT</i>         | 4-amino-4-deoxy-L-arabinose transferase                                                                            |
| LFTS_01329                             | <i>rfaF</i>         | ADP-heptose:LPS heptosyltransferase II                                                                             |
| LFTS_01330                             | <i>DPM1</i>         | Dolichol-phosphate mannosyltransferase                                                                             |
| LFTS_01331                             | <i>arnT</i>         | 4-amino-4-deoxy-L-arabinose transferase                                                                            |
| LFTS_01345                             | <i>lptG</i>         | Lipopolysaccharide export ABC permease of the LptBFGC export complex                                               |
| LFTS_01346                             | <i>lptF</i>         | Lipopolysaccharide export ABC permease of the LptBFGC export complex                                               |
| LFTS_01629                             | <i>rfaD</i>         | ADP-L-glycero-D-mannoheptose-6-epimerase                                                                           |
| LFTS_01631                             | <i>mef</i>          | Macrolide-efflux protein                                                                                           |
| LFTS_01632                             | <i>BGLUT</i>        | UDP-glucose:tetrahydrobiopterin glycosyltransferase                                                                |
| LFTS_01633                             | <i>otsA</i>         | Trehalose 6-phosphate synthase                                                                                     |
| LFTS_01634                             | <i>otsB</i>         | Trehalose 6-phosphate phosphatase                                                                                  |
| LFTS_01635                             | <i>rfbD, rmlD</i>   | dTDP-4-dehydrorhamnose reductase                                                                                   |
| LFTS_01721                             | <i>arnE</i>         | Undecaprenyl phosphate-alpha-L-ara4N exporter                                                                      |
| LFTS_01782                             | <i>hddC</i>         | D-glycero-alpha-D-manno-heptose 1-phosphate guanylyltransferase                                                    |
| LFTS_01783                             | <i>galE</i>         | UDP-galactose-4-epimerase                                                                                          |
| LFTS_01808                             | <i>rfaF</i>         | ADP-heptose:LPS heptosyltransferase                                                                                |
| LFTS_01809                             | <i>mtfB</i>         | Mannosyltransferase, alpha-1,3-rhamnosyltransferase                                                                |
| LFTS_01810                             |                     | Putative group 1 glycosyltransferase                                                                               |
| LFTS_01811                             | <i>wbpX</i>         | Glycosyltransferase, alpha-1,2-rhamnosyltransferase                                                                |
| LFTS_01812                             | <i>ABC-2.LPSE.A</i> | Lipopolysaccharide transport system ATP-binding protein                                                            |
| LFTS_01813                             | <i>ABC-2.LPSE.P</i> | Lipopolysaccharide transport system permease protein                                                               |
| LFTS_01814                             | <i>rfbP</i>         | Undecaprenyl-phosphate galactose phosphotransferase                                                                |
| LFTS_01815                             | <i>pimB</i>         | Group 1 glycosyl transferase, phosphatidylinositol alpha-1,6-mannosyltransferase                                   |
| LFTS_01816                             | <i>mtfB</i>         | Mannosyltransferase, alpha-1,3-rhamnosyltransferase                                                                |

|                                                                    |                   |                                                                                                                    |
|--------------------------------------------------------------------|-------------------|--------------------------------------------------------------------------------------------------------------------|
| LFTS_02328                                                         | <i>rfaF</i>       | ADP-heptose:LPS heptosyltransferase II                                                                             |
| LFTS_02329                                                         | <i>cgeB</i>       | Spore maturation protein                                                                                           |
| LFTS_02330                                                         | <i>rfaF</i>       | ADP-heptose:LPS heptosyltransferase II                                                                             |
| LFTS_02331                                                         | <i>tam</i>        | Putative trans-aconitate 2-methyltransferase                                                                       |
| LFTS_02332                                                         | <i>cgeB</i>       | Spore maturation protein                                                                                           |
| LFTS_02488                                                         | <i>lpxC</i>       | UDP-3-O-[3-hydroxymyristoyl] N-acetylglucosamine deacetylase                                                       |
| <b>Extracellular polysaccharide production and export</b>          |                   |                                                                                                                    |
| LFTS_00424                                                         | <i>wzzE</i>       | Polysaccharide chain length modulation protein                                                                     |
| LFTS_00488                                                         | <i>rfbB, rffG</i> | dTDP-glucose 4,6-dehydratase                                                                                       |
| LFTS_00489<br>LFTS_00121                                           | <i>rfbA, rffA</i> | Glucose-1-phosphate thymidyltransferase                                                                            |
| LFTS_00490                                                         | <i>rfbC, rmlC</i> | dTDP-4-dehydrorhamnose 3,5-epimerase                                                                               |
| LFTS_00492                                                         | <i>(algK)</i>     | Sel-1 repeat protein                                                                                               |
| LFTS_00528                                                         | <i>pimA</i>       | Phosphatidylinositol alpha-mannosyltransferase                                                                     |
| LFTS_00529<br>LFTS_00530<br>LFTS_00531<br>LFTS_00532<br>LFTS_00540 |                   | Glycosyl transferase family protein                                                                                |
| LFTS_00535                                                         |                   | EpsI family protein                                                                                                |
| LFTS_00536                                                         | <i>epsH</i>       | Eight transmembrane protein, glycosyltransferase                                                                   |
| LFTS_00537                                                         | <i>rfbA, rffA</i> | Glucose-1-phosphate thymidyltransferase                                                                            |
| LFTS_00538                                                         |                   | Putative PEP-CTERM system histidine kinase                                                                         |
| LFTS_00539                                                         |                   | Putative PEP-CTERM system histidine kinase                                                                         |
| LFTS_00541                                                         | <i>wbdM</i>       | Glycosyltransferase                                                                                                |
| LFTS_00543                                                         |                   | Putative inner membrane protein, O-antigen polymerase, Exopolysaccharide biosynthesis family protein               |
| LFTS_00544<br>LFTS_00545                                           | <i>rfaG</i>       | Glucosyltransferase I                                                                                              |
| LFTS_00546                                                         | <i>pimB</i>       | Group 1 glycosyl transferase, phosphatidylinositol alpha-1,6-mannosyltransferase                                   |
| LFTS_00547                                                         | <i>pgaC, icaA</i> | Predicted glycosyl transferase, biofilm PGA synthesis N-glycosyltransferase                                        |
| LFTS_00548                                                         | <i>pgaB</i>       | Biofilm adhesin polysaccharide PGA export lipoprotein with a polysaccharide deacetylase activity needed for export |
| LFTS_00550                                                         | <i>wza</i>        | Polysaccharide export outer membrane protein                                                                       |
| LFTS_00551                                                         | <i>wcaJ</i>       | Putative colanic acid biosynthesis UDP-glucose lipid carrier transferase                                           |
| LFTS_00552                                                         | <i>wzz</i>        | Chain length determinant protein                                                                                   |
| LFTS_00565                                                         | <i>glf</i>        | UDP-galactopyranose mutase                                                                                         |
| LFTS_00566                                                         |                   | UDP-glucuronate 4-epimerase                                                                                        |
| LFTS_00568                                                         |                   | PilZ domain-containing protein, sigma 54-dependent response regulator                                              |
| LFTS_00569                                                         | <i>glmS</i>       | Glucosamine--fructose-6-phosphate aminotransferase                                                                 |

|                                        |                                     |                                                                         |
|----------------------------------------|-------------------------------------|-------------------------------------------------------------------------|
| LFTS_00570                             | <i>wbpA</i>                         | UDP-N-acetyl-D-glucosamine dehydrogenase                                |
| LFTS_00572<br>LFTS_00683<br>LFTS_00656 | <i>galE</i>                         | UDP-galactose-4-epimerase                                               |
| LFTS_00573                             |                                     | PilZ domain-containing protein, sigma 54-dependent response regulator   |
| LFTS_00769                             | <i>pmm, pgm</i>                     | Phosphomannomutase / phosphoglucomutase                                 |
| LFTS_00770                             | <i>algA, xanB, rfbA, wbpW, pslB</i> | Mannose-1-phosphate guanylyltransferase / mannose-6-phosphate isomerase |
| LFTS_01394                             | <i>pgm</i>                          | Phosphoglucomutase                                                      |
| LFTS_01526                             | <i>uxs 1</i>                        | UDP-glucuronate decarboxylase 1                                         |
| LFTS_01528                             | <i>ugd</i>                          | UDP-glucose 6-dehydrogenase                                             |
| LFTS_01564                             |                                     | Membrane protein; Chitin synthase                                       |
| LFTS_02426                             | <i>galT</i>                         | Galactose-1-phosphate uridylyltransferase                               |

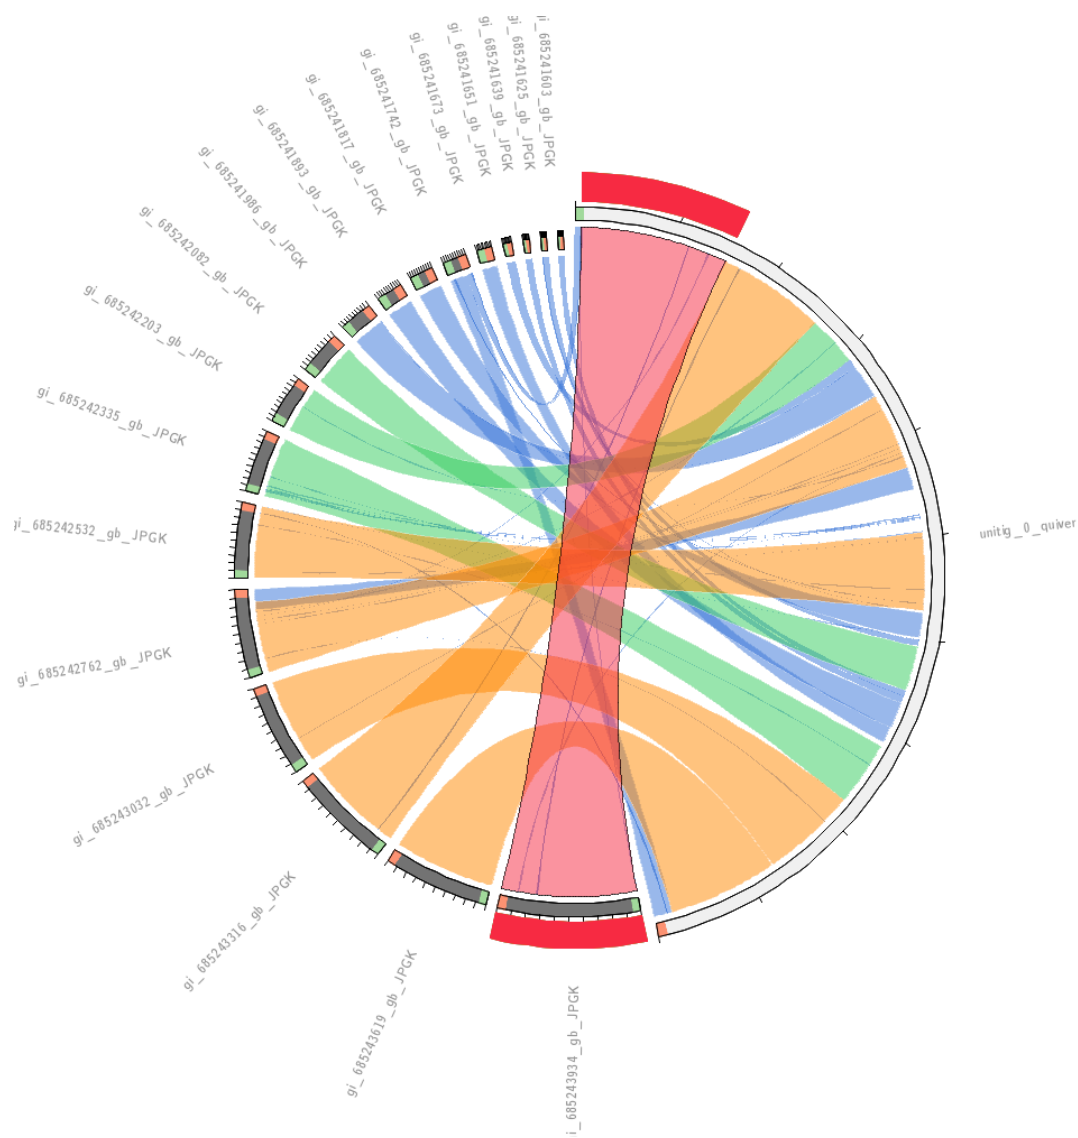

**FIG S1** Circoletto plot (1) (<http://tools.bat.infspire.org/circoletto/> 10/01/2015) showing a comparison between the new assembly contig1 (white) and the 18 contigs of the draft genome (2). Default settings were used and colored ribbons indicate relative alignment scores which in this case primarily reflect sequence length.

# A

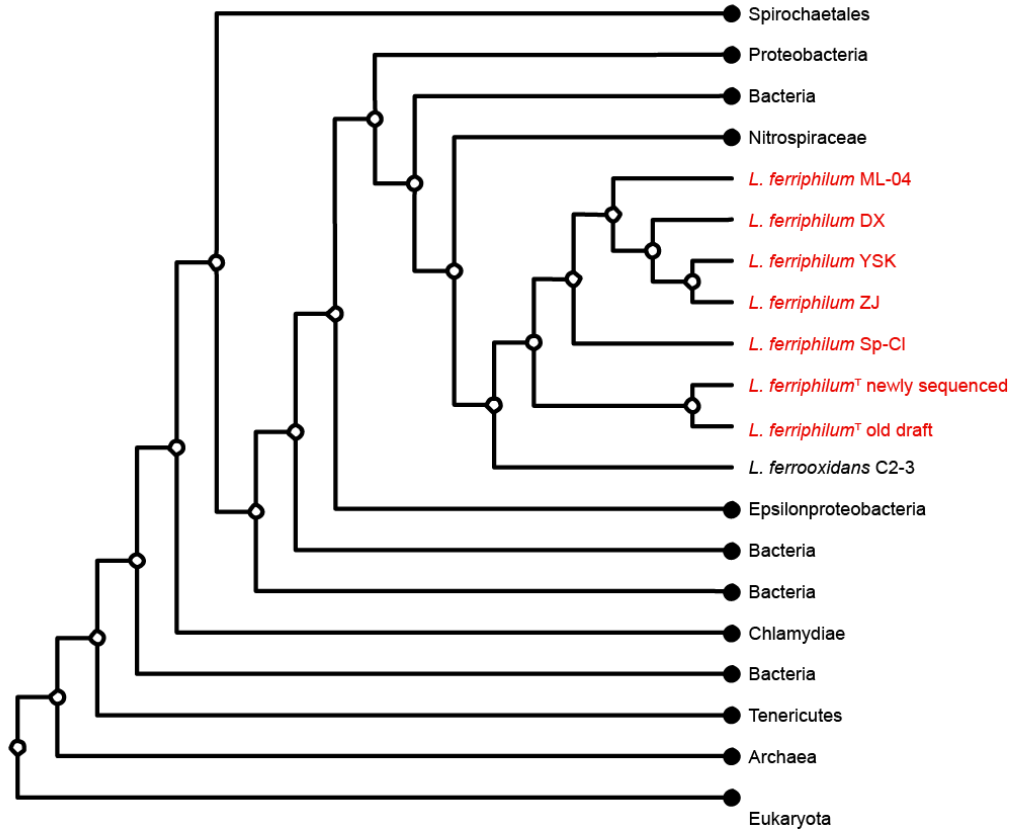

# B

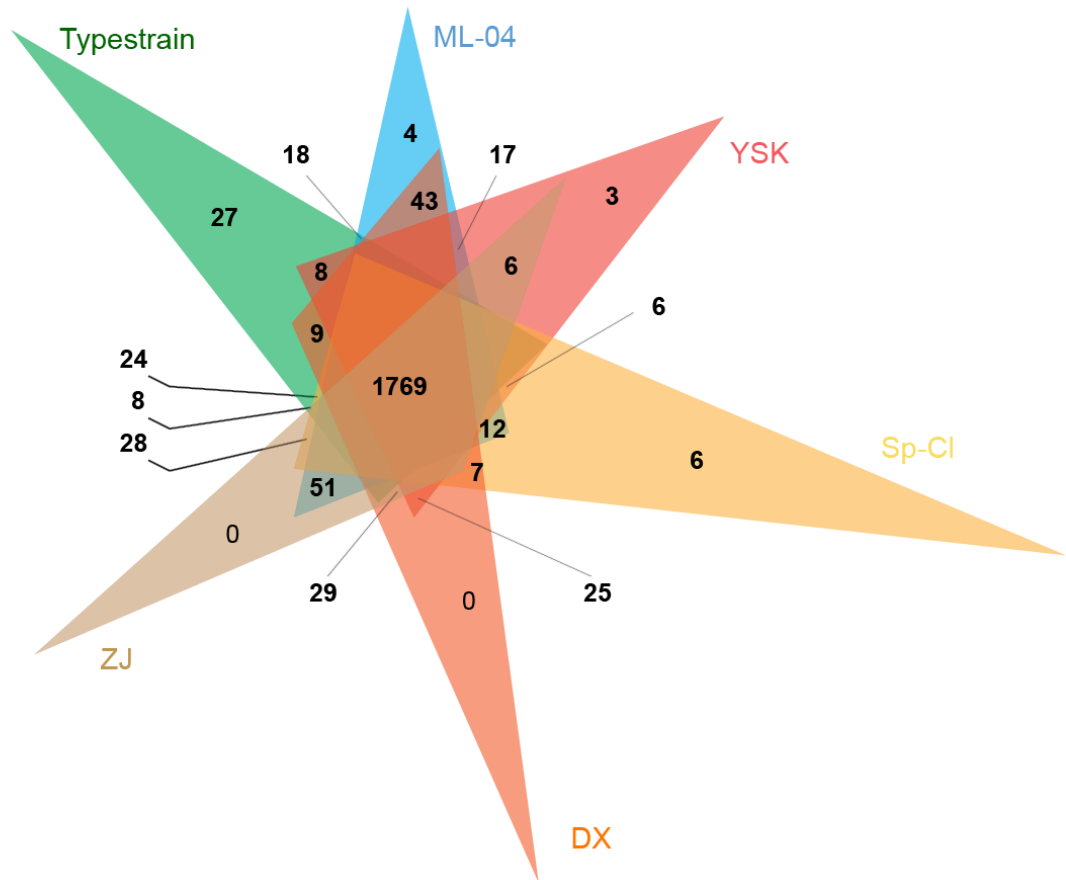

**FIG S2** Phylogenetic placement and relationship of *L. ferriphilum* strains. Shown are an evolutionary tree of the available strains (A), and a Venn diagram of orthologous gene clusters (B). The phylogenetic tree was constructed with CVTree3 (3) (<http://tlife.fudan.edu.cn/archaea/cvtree/cvtree3/> 30/10/2017) using amino acid sequences with a K-tuple length of 6. Venn diagram was created with OrthoVenn (4) (<http://www.bioinfogenome.net/OrthoVenn/index.php> 30/10/2017) using protein sequences downloaded from NCBI as input. More detailed analysis as well as functional categories assigned to shared genes can be found under url <http://www.bioinfogenome.net/OrthoVenn/result.php?ID=d0faeba113424e41958bda82bce23f37>.

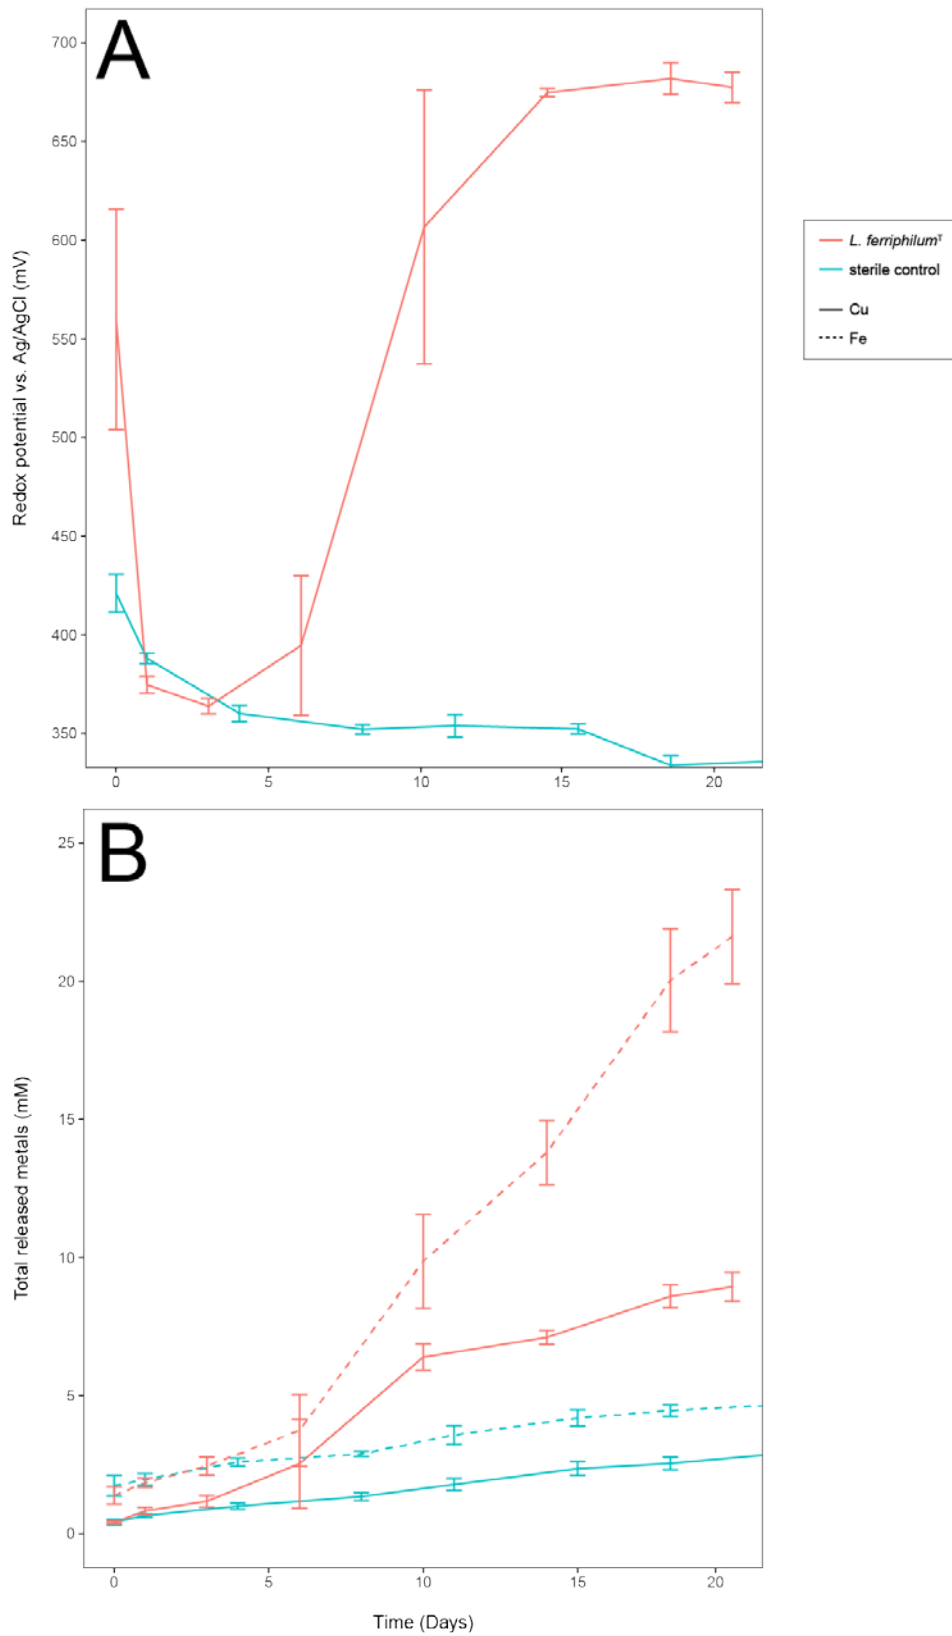

**FIG S3** Redox potential (A) and release of copper and iron (B) from chalcopyrite concentrate during bioleaching by *L. ferriphilum*<sup>T</sup> compared to a sterile control.



**REPORT S1** Details of the PacBio sequencing run.

Reports for Job pb\_238\_HGAP3\_CTR

SMRT Cells: 2 Movies: 2

Overview

| Job Metric                              | Value         |
|-----------------------------------------|---------------|
| Polished Contigs                        | 2             |
| Adapter Dimers (0-10bp)                 | 0.0%          |
| Short Inserts (11-100bp)                | 0.0%          |
| Number of Bases                         | 1,686,331,902 |
| Number of Reads                         | 136,837       |
| N50 Read Length                         | 17,183        |
| Mean Read Length                        | 12,323        |
| Mean Read Score                         | 0.86          |
| Mapped Reads                            | 128,992       |
| Mapped Read Length of Insert            | 8,775         |
| Average Reference Length                | 1,305,184     |
| Average Reference Bases Called          | 100.0%        |
| Average Reference Consensus Concordance | 99.99%        |
| Average Reference Coverage              | 565.78        |

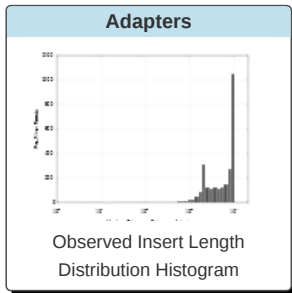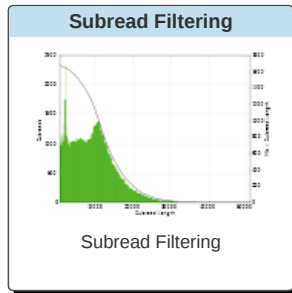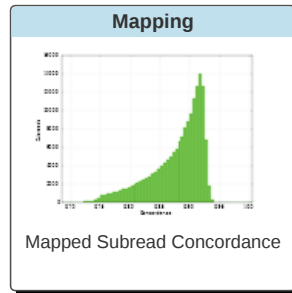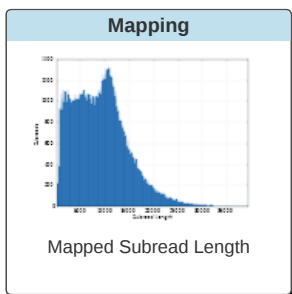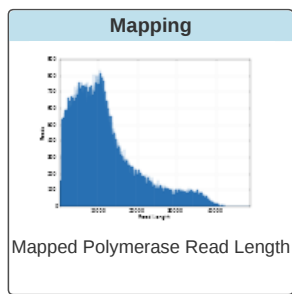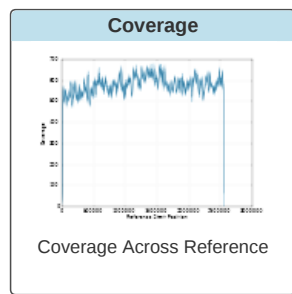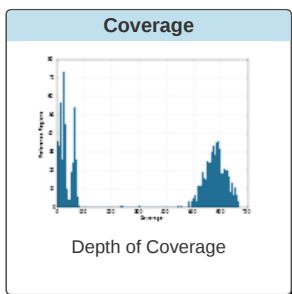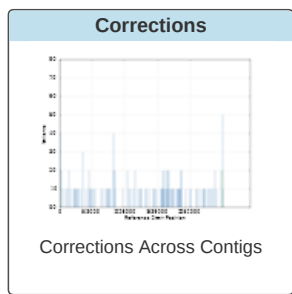

Filtering

| Filtering               |            |             |
|-------------------------|------------|-------------|
| Metrics                 | Pre-Filter | Post-Filter |
| Polymerase Read Bases   | 1861631140 | 1686331902  |
| Polymerase Reads        | 300584     | 136837      |
| Polymerase Read N50     | 16709      | 17183       |
| Polymerase Read Length  | 6193       | 12323       |
| Polymerase Read Quality | 0.436      | 0.862       |

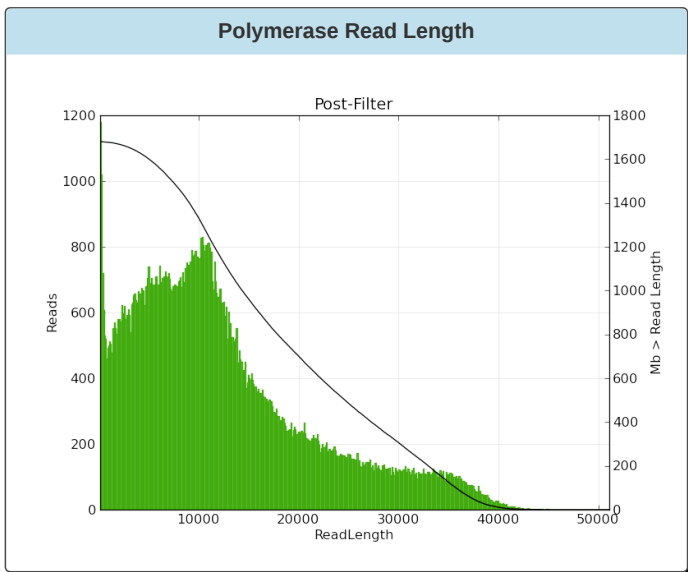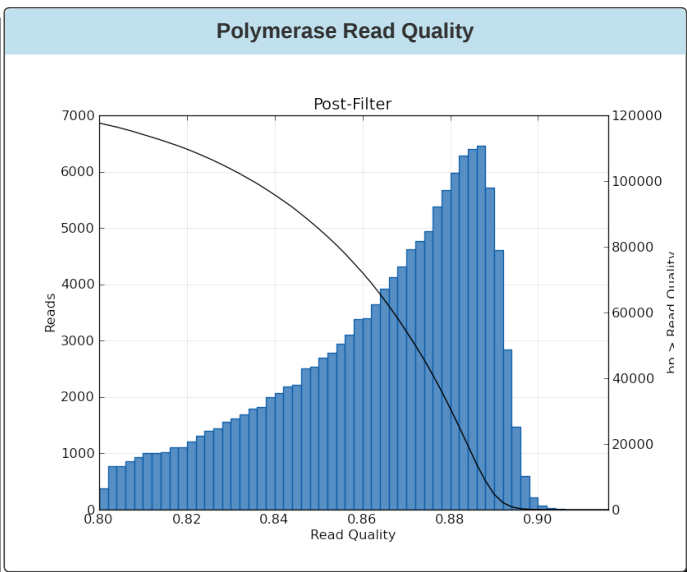

Subread Filtering

|                       |               |                 |         |
|-----------------------|---------------|-----------------|---------|
| Mean Subread length   | 9,262         | N50             | 12,114  |
| Total Number of Bases | 1,682,372,470 | Number of Reads | 181,637 |

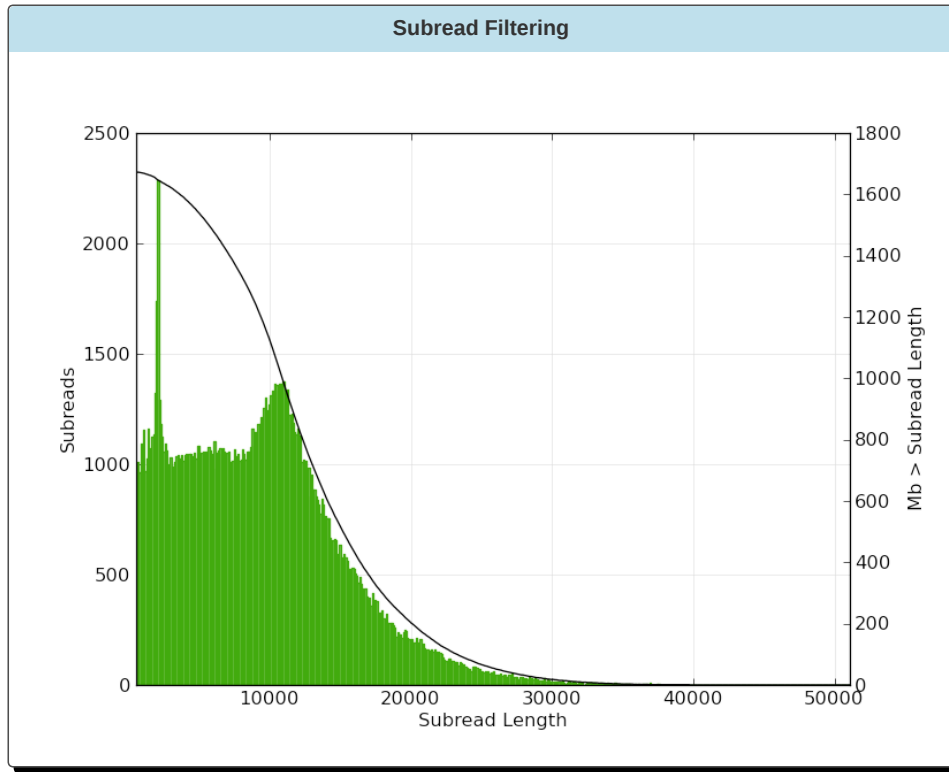

**Adapters**

Adapter Dimers (0-10bp) 0.0%  
 Short Inserts (11-100bp) 0.0%

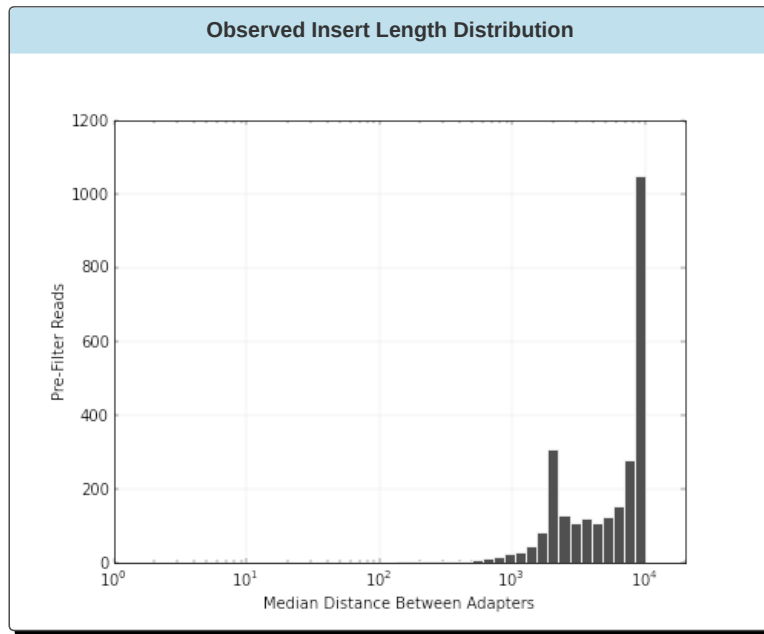

**Loading**

| SMRT Cell ID                                           | Productive ZMWs | ZMW Loading For Productivity 0 | ZMW Loading For Productivity 1 | ZMW Loading For Productivity 2 |
|--------------------------------------------------------|-----------------|--------------------------------|--------------------------------|--------------------------------|
| m150926_080424_42237_c10088789255000001823197504021641 | 150,292         | 32.84%                         | 53.96%                         | 13.2%                          |
| m150926_034511_42237_c10088789255000001823197504021640 | 150,292         | 45.69%                         | 44.41%                         | 9.9%                           |

**Mapping**

Mapped Subread Length N50 (bp) 11,696 Mapped Polymerase Read Length 95% (bp) 31,070  
 Mapped Subread Length Mean (bp) 8,955 Mapped Polymerase Read Length Max (bp) 48,549

**Mapping Stats Summary**

| Movie                                                        | Mapped Read | Mapped Polymerase Read Length | Mapped Polymerase Read Length N50 | Mapped Subreads | Mapped Subread Bases | Mapped Subread Length | Mean Mapped Subread Concordance |
|--------------------------------------------------------------|-------------|-------------------------------|-----------------------------------|-----------------|----------------------|-----------------------|---------------------------------|
| All Movies                                                   | 128,992     | 11,821                        | 16038                             | 169,430         | 1517325035           | 8,955                 | 0.872                           |
| m150926_080424_42237_c10088789255000001823197504021641_s1_p0 | 70,296      | 11,851                        | 16028                             | 92,705          | 828324597            | 8,935                 | 0.870                           |
| m150926_034511_42237_c10088789255000001823197504021640_s1_p0 | 58,696      | 11,786                        | 16052                             | 76,725          | 689000438            | 8,980                 | 0.875                           |

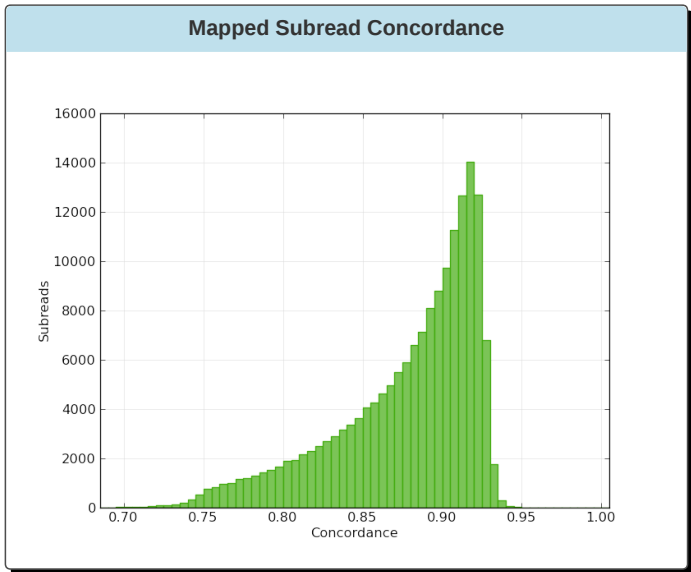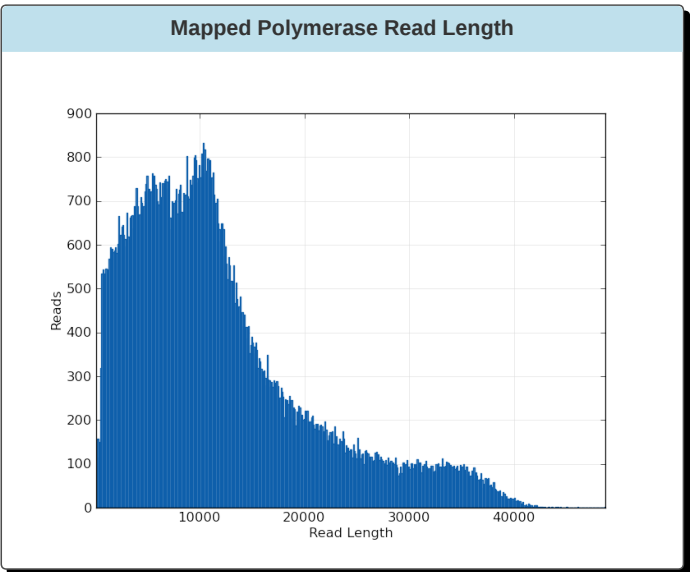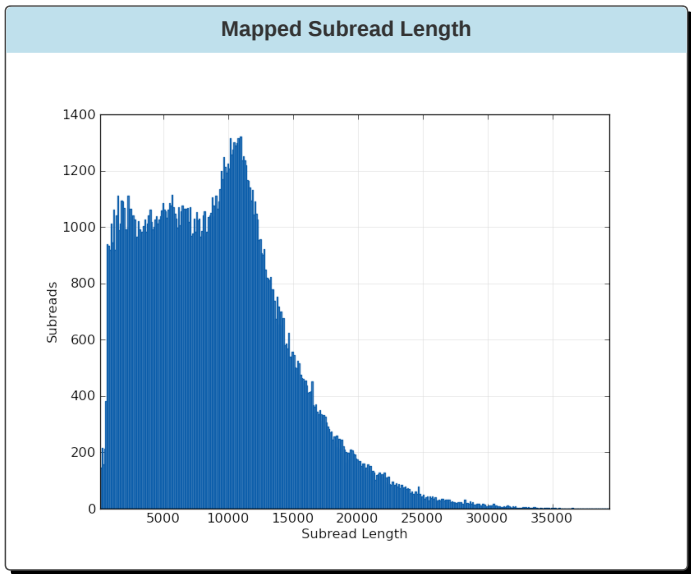

### Coverage

Mean Coverage 565.78  
Missing Bases (%) 0.0

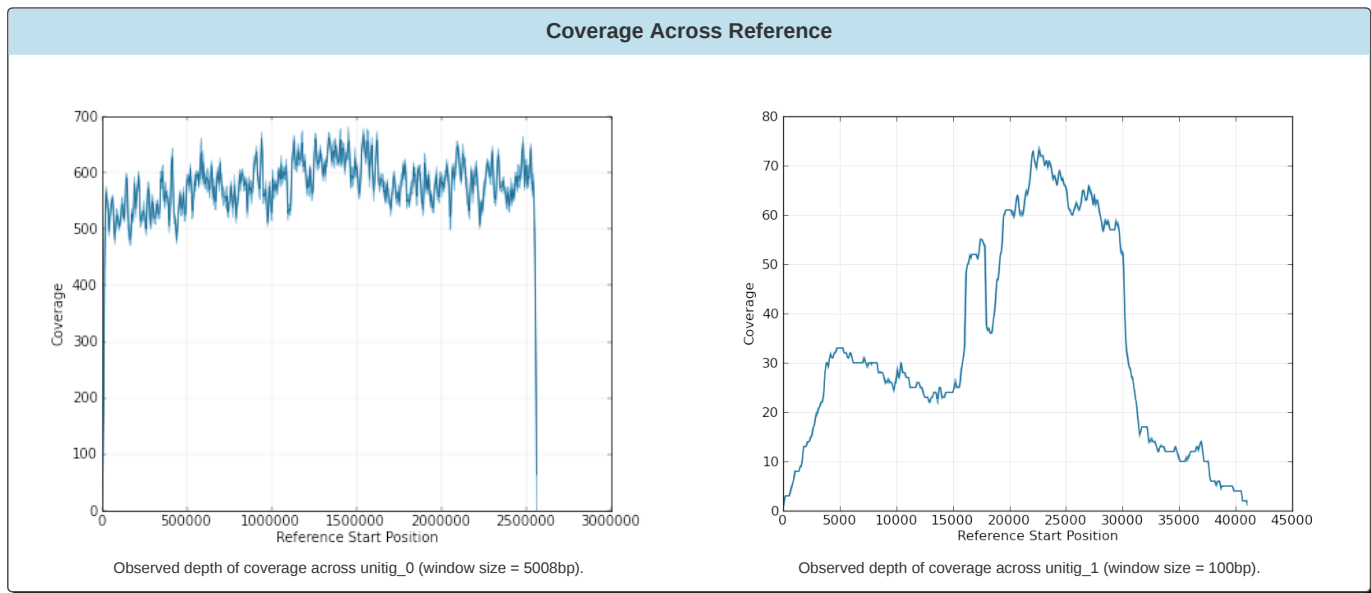

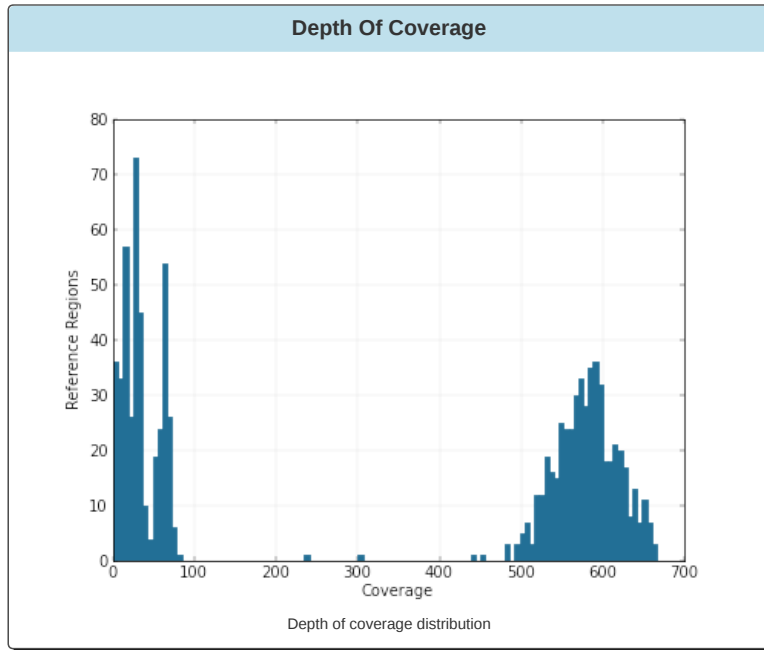

**Pre-Assembler Report**

|                            |               |                     |            |
|----------------------------|---------------|---------------------|------------|
| Polymerase Read Bases      | 1,682,372,470 | Length Cutoff       | 23,786     |
| Seed Bases                 | 90,002,907    | Pre-Assembled bases | 70,524,771 |
| Pre-Assembled Yield        | .784          | Pre-Assembled Reads | 3,720      |
| Pre-Assembled Reads Length | 18,958        | Pre-Assembled N50   | 24,656     |

**Polished Assembly**

|                   |           |                       |           |
|-------------------|-----------|-----------------------|-----------|
| Polished Contigs  | 2         | Max Contig Length     | 2,569,357 |
| N50 Contig Length | 2,569,357 | Sum of Contig Lengths | 2,610,531 |

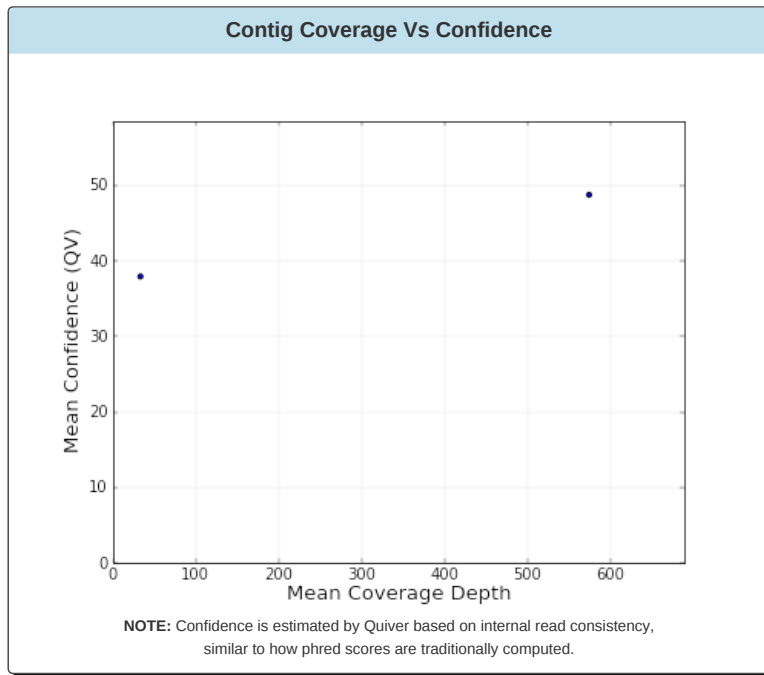

**Top Corrections**

| Sequence | Position  | Correction          | Type | Coverage | Confidence | Genotype |
|----------|-----------|---------------------|------|----------|------------|----------|
| unitig_0 | 2,401,913 | 2401913_2401914insG | INS  | 100      | 53         | haploid  |
| unitig_0 | 5,786     | 5786_5787insT       | INS  | 38       | 52         | haploid  |
| unitig_0 | 110,087   | 110087_110088insG   | INS  | 100      | 52         | haploid  |
| unitig_0 | 1,469,353 | 1469353_1469354insG | INS  | 100      | 52         | haploid  |
| unitig_0 | 252,057   | 252057_252058insG   | INS  | 100      | 51         | haploid  |
| unitig_0 | 481,852   | 481852_481853insG   | INS  | 100      | 51         | haploid  |
| unitig_0 | 783,126   | 783126_783127insC   | INS  | 100      | 51         | haploid  |
| unitig_0 | 1,099,462 | 1099462_1099463insG | INS  | 100      | 51         | haploid  |
| unitig_0 | 1,152,713 | 1152713_1152714insC | INS  | 100      | 51         | haploid  |
| unitig_0 | 1,602,548 | 1602548_1602549insG | INS  | 100      | 51         | haploid  |
| unitig_0 | 1,873,482 | 1873482_1873483insG | INS  | 100      | 51         | haploid  |
| unitig_0 | 1,889,871 | 1889871_1889872insC | INS  | 100      | 51         | haploid  |
| unitig_0 | 2,363,046 | 2363046_2363047insG | INS  | 100      | 51         | haploid  |

|          |           |                     |     |     |    |         |
|----------|-----------|---------------------|-----|-----|----|---------|
| unitig_0 | 2,564,819 | 2564819_2564820insC | INS | 14  | 51 | haploid |
| unitig_1 | 4,411     | 4411_4412insT       | INS | 30  | 51 | haploid |
| unitig_1 | 8,659     | 8659_8660insT       | INS | 28  | 51 | haploid |
| unitig_1 | 14,554    | 14554_14555insT     | INS | 24  | 51 | haploid |
| unitig_1 | 14,613    | 14613_14614insTTCTC | INS | 24  | 51 | haploid |
| unitig_1 | 14,688    | 14688_14689insC     | INS | 24  | 51 | haploid |
| unitig_1 | 14,807    | 14807_14808insT     | INS | 24  | 51 | haploid |
| unitig_1 | 15,221    | 15221_15222insCAG   | INS | 25  | 51 | haploid |
| unitig_0 | 1,817     | 1817_1818insA       | INS | 11  | 50 | haploid |
| unitig_0 | 4,594     | 4594_4595insC       | INS | 29  | 50 | haploid |
| unitig_0 | 6,607     | 6607_6608insC       | INS | 54  | 50 | haploid |
| unitig_0 | 17,580    | 17580_17581insG     | INS | 100 | 50 | haploid |
| unitig_0 | 149,813   | 149813_149814insG   | INS | 100 | 50 | haploid |
| unitig_0 | 256,607   | 256607_256608insC   | INS | 100 | 50 | haploid |
| unitig_0 | 293,067   | 293067_293068insC   | INS | 100 | 50 | haploid |
| unitig_0 | 366,710   | 366710_366711insG   | INS | 100 | 50 | haploid |
| unitig_0 | 451,437   | 451437_451438insC   | INS | 100 | 50 | haploid |
| unitig_0 | 466,869   | 466869_466870insC   | INS | 100 | 50 | haploid |
| unitig_0 | 654,441   | 654441_654442insG   | INS | 100 | 50 | haploid |
| unitig_0 | 671,519   | 671519_671520insC   | INS | 100 | 50 | haploid |
| unitig_0 | 846,989   | 846989_846990insG   | INS | 100 | 50 | haploid |
| unitig_0 | 857,372   | 857372_857373insC   | INS | 100 | 50 | haploid |
| unitig_0 | 1,115,970 | 1115970_1115971insC | INS | 100 | 50 | haploid |
| unitig_0 | 1,192,088 | 1192088_1192089insC | INS | 100 | 50 | haploid |
| unitig_0 | 1,278,328 | 1278328_1278329insC | INS | 100 | 50 | haploid |
| unitig_0 | 1,353,258 | 1353258_1353259insC | INS | 100 | 50 | haploid |
| unitig_0 | 1,514,175 | 1514175_1514176insC | INS | 100 | 50 | haploid |
| unitig_0 | 1,523,097 | 1523097_1523098insG | INS | 100 | 50 | haploid |
| unitig_0 | 1,686,356 | 1686356_1686357insG | INS | 100 | 50 | haploid |
| unitig_0 | 1,724,903 | 1724903_1724904insG | INS | 100 | 50 | haploid |
| unitig_0 | 1,772,881 | 1772881_1772882insC | INS | 100 | 50 | haploid |
| unitig_0 | 1,877,219 | 1877219_1877220insG | INS | 100 | 50 | haploid |
| unitig_0 | 1,912,330 | 1912330_1912331insG | INS | 100 | 50 | haploid |
| unitig_0 | 1,977,390 | 1977390_1977391insG | INS | 100 | 50 | haploid |
| unitig_0 | 2,190,358 | 2190358_2190359insG | INS | 100 | 50 | haploid |
| unitig_0 | 2,286,825 | 2286825_2286826insG | INS | 100 | 50 | haploid |
| unitig_0 | 2,330,394 | 2330394_2330395insG | INS | 100 | 50 | haploid |
| unitig_0 | 2,348,211 | 2348211_2348212insC | INS | 100 | 50 | haploid |
| unitig_0 | 2,436,019 | 2436019_2436020insG | INS | 100 | 50 | haploid |
| unitig_0 | 2,464,531 | 2464531_2464532insC | INS | 100 | 50 | haploid |
| unitig_0 | 2,551,483 | 2551483_2551484insC | INS | 100 | 50 | haploid |
| unitig_1 | 1,976     | 1976_1977insC       | INS | 12  | 50 | haploid |
| unitig_1 | 2,191     | 2191_2192insA       | INS | 13  | 50 | haploid |
| unitig_1 | 7,083     | 7083_7084insCC      | INS | 29  | 50 | haploid |
| unitig_1 | 8,577     | 8577_8578insG       | INS | 28  | 50 | haploid |
| unitig_1 | 8,723     | 8723_8724insT       | INS | 27  | 50 | haploid |
| unitig_1 | 12,367    | 12367_12368insC     | INS | 23  | 50 | haploid |
| unitig_1 | 13,826    | 13826delA           | DEL | 25  | 50 | haploid |
| unitig_1 | 14,218    | 14218_14219insC     | INS | 23  | 50 | haploid |
| unitig_1 | 14,632    | 14632delAA          | DEL | 24  | 50 | haploid |
| unitig_1 | 14,916    | 14916_14917insG     | INS | 24  | 50 | haploid |
| unitig_1 | 15,052    | 15052_15053insC     | INS | 24  | 50 | haploid |
| unitig_1 | 15,288    | 15288_15289insT     | INS | 27  | 50 | haploid |
| unitig_1 | 15,438    | 15438_15439insA     | INS | 25  | 50 | haploid |
| unitig_1 | 15,554    | 15554_15555insA     | INS | 25  | 50 | haploid |
| unitig_0 | 2,191     | 2191_2192insG       | INS | 13  | 49 | haploid |
| unitig_0 | 3,740     | 3740delC            | DEL | 26  | 49 | haploid |
| unitig_0 | 19,193    | 19193_19194insG     | INS | 100 | 49 | haploid |
| unitig_0 | 49,146    | 49146_49147insC     | INS | 100 | 49 | haploid |
| unitig_0 | 93,555    | 93555_93556insG     | INS | 100 | 49 | haploid |
| unitig_0 | 182,764   | 182764_182765insG   | INS | 100 | 49 | haploid |
| unitig_0 | 210,334   | 210334_210335insG   | INS | 100 | 49 | haploid |
| unitig_0 | 233,679   | 233679_233680insG   | INS | 100 | 49 | haploid |
| unitig_0 | 247,181   | 247181_247182insC   | INS | 100 | 49 | haploid |
| unitig_0 | 366,371   | 366371_366372insG   | INS | 100 | 49 | haploid |
| unitig_0 | 368,802   | 368802_368803insG   | INS | 100 | 49 | haploid |
| unitig_0 | 465,391   | 465391_465392insC   | INS | 100 | 49 | haploid |
| unitig_0 | 475,673   | 475673_475674insG   | INS | 100 | 49 | haploid |

|          |           |                     |     |     |    |         |
|----------|-----------|---------------------|-----|-----|----|---------|
| unitig_U | 564,532   | 564532_564533insC   | INS | 100 | 49 | haploid |
| unitig_0 | 730,933   | 730933_730934insC   | INS | 100 | 49 | haploid |
| unitig_0 | 759,497   | 759497_759498insG   | INS | 100 | 49 | haploid |
| unitig_0 | 764,923   | 764923_764924insG   | INS | 100 | 49 | haploid |
| unitig_0 | 769,268   | 769268_769269insC   | INS | 100 | 49 | haploid |
| unitig_0 | 811,375   | 811375_811376insG   | INS | 100 | 49 | haploid |
| unitig_0 | 867,219   | 867219_867220insG   | INS | 100 | 49 | haploid |
| unitig_0 | 868,383   | 868383_868384insC   | INS | 100 | 49 | haploid |
| unitig_0 | 880,064   | 880064_880065insG   | INS | 100 | 49 | haploid |
| unitig_0 | 982,668   | 982668_982669insC   | INS | 100 | 49 | haploid |
| unitig_0 | 1,229,785 | 1229785_1229786insC | INS | 100 | 49 | haploid |
| unitig_0 | 1,259,693 | 1259693_1259694insG | INS | 100 | 49 | haploid |
| unitig_0 | 1,288,176 | 1288176_1288177insC | INS | 100 | 49 | haploid |
| unitig_0 | 1,410,660 | 1410660_1410661insC | INS | 100 | 49 | haploid |
| unitig_0 | 1,619,692 | 1619692_1619693insC | INS | 100 | 49 | haploid |
| unitig_0 | 1,624,878 | 1624878_1624879insG | INS | 100 | 49 | haploid |
| unitig_0 | 1,627,765 | 1627765_1627766insC | INS | 100 | 49 | haploid |
| unitig_0 | 1,692,837 | 1692837_1692838insG | INS | 100 | 49 | haploid |
| unitig_0 | 1,699,835 | 1699835_1699836insC | INS | 100 | 49 | haploid |

Corrections

| Consensus Calling Results |                  |              |                       |          |
|---------------------------|------------------|--------------|-----------------------|----------|
| Reference                 | Reference Length | Bases Called | Consensus Concordance | Coverage |
| unitig_0                  | 2,569,226        | 100.0%       | 99.9947%              | 574.31   |
| unitig_1                  | 41,141           | 99.93%       | 99.8735%              | 32.91    |

Corrections Across Reference

- Insertions
- Deletions
- Substitutions

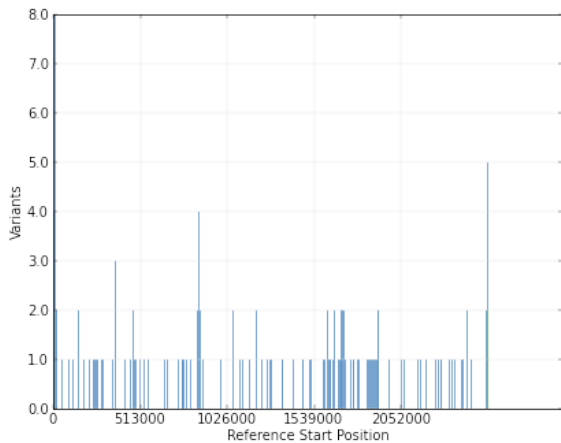

Observed variants across unitig\_0.

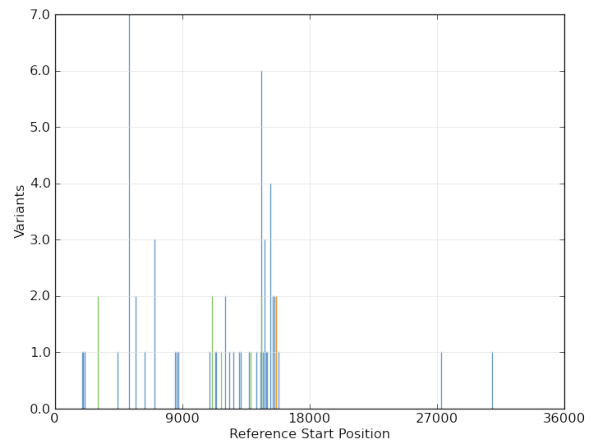

Observed variants across unitig\_1.

**REPORT S2** Summary of CRISPR and phage association predictions for contig1 and contig2.



# CRISPR Analysis of the two assembly contigs

Two assembly contigs unitq\_0 (chromosome sequence of *Leptospirillum ferriphilum*) and unitq\_1 were analyzed.

## Prediction with CRISPRone

[http://omics.informatics.indiana.edu/CRISPRone/show\\_col.php?col=tmp&id=bT65H11U](http://omics.informatics.indiana.edu/CRISPRone/show_col.php?col=tmp&id=bT65H11U)

## metaCRT

<http://omics.informatics.indiana.edu/CRISPR/>

Used for CRISPR detection and extraction of repeat and spacer sequences

Comparison of spacer sequences to unitq\_1 with blast:

| qseqid                                            | sseqid                | pident | length | mismatch | gapopen | qstart | qend | qlen | qcovs | sstart | send  | slen  | eval | bitscore |
|---------------------------------------------------|-----------------------|--------|--------|----------|---------|--------|------|------|-------|--------|-------|-------|------|----------|
| metacrct_contigs-mgmt_unitig_0_quiver:c1:p1162280 | unitig_1_quiver75.00  | 24     | 6      | 0        | 9       | 32     | 33   | 73   | 40285 | 40308  | 41174 | 0.34  | 20.6 |          |
| metacrct_contigs-mgmt_unitig_0_quiver:c1:p1162340 | unitig_1_quiver77.27  | 22     | 5      | 0        | 1       | 22     | 33   | 91   | 5125  | 5146   | 41174 | 0.34  | 20.6 |          |
| metacrct_contigs-mgmt_unitig_0_quiver:c1:p1162340 | unitig_1_quiver77.27  | 22     | 5      | 0        | 9       | 30     | 33   | 91   | 13922 | 13901  | 41174 | 0.34  | 20.6 |          |
| metacrct_contigs-mgmt_unitig_0_quiver:c1:p1162400 | unitig_1_quiver92.86  | 14     | 1      | 0        | 6       | 19     | 33   | 42   | 11374 | 11387  | 41174 | 0.34  | 20.6 |          |
| metacrct_contigs-mgmt_unitig_0_quiver:c1:p1162460 | unitig_1_quiver88.89  | 18     | 2      | 0        | 11      | 28     | 33   | 67   | 9410  | 9427   | 41174 | 0.037 | 23.8 |          |
| metacrct_contigs-mgmt_unitig_0_quiver:c1:p1162460 | unitig_1_quiver77.27  | 22     | 5      | 0        | 11      | 32     | 33   | 67   | 40729 | 40708  | 41174 | 0.34  | 20.6 |          |
| metacrct_contigs-mgmt_unitig_0_quiver:c1:p1162580 | unitig_1_quiver100.00 | 12     | 0      | 0        | 17      | 28     | 32   | 38   | 11330 | 11319  | 41174 | 0.34  | 20.6 |          |
| metacrct_contigs-mgmt_unitig_0_quiver:c1:p1162640 | unitig_1_quiver100.00 | 12     | 0      | 0        | 12      | 23     | 33   | 36   | 25856 | 25845  | 41174 | 0.34  | 20.6 |          |
| metacrct_contigs-mgmt_unitig_0_quiver:c1:p1162700 | unitig_1_quiver85.00  | 20     | 3      | 0        | 1       | 20     | 33   | 61   | 37169 | 37188  | 41174 | 0.037 | 23.8 |          |
| metacrct_contigs-mgmt_unitig_0_quiver:c1:p1162880 | unitig_1_quiver100.00 | 12     | 0      | 0        | 12      | 23     | 33   | 36   | 8686  | 8697   | 41174 | 0.34  | 20.6 |          |
| metacrct_contigs-mgmt_unitig_0_quiver:c1:p1162950 | unitig_1_quiver84.21  | 19     | 3      | 0        | 15      | 33     | 33   | 85   | 24864 | 24882  | 41174 | 0.11  | 22.2 |          |
| metacrct_contigs-mgmt_unitig_0_quiver:c1:p1162950 | unitig_1_quiver87.50  | 16     | 2      | 0        | 6       | 21     | 33   | 85   | 6536  | 6521   | 41174 | 0.34  | 20.6 |          |
| metacrct_contigs-mgmt_unitig_0_quiver:c1:p1162950 | unitig_1_quiver80.00  | 20     | 4      | 0        | 13      | 32     | 33   | 85   | 12655 | 12636  | 41174 | 0.34  | 20.6 |          |
| metacrct_contigs-mgmt_unitig_0_quiver:c1:p1163010 | unitig_1_quiver80.95  | 21     | 4      | 0        | 3       | 23     | 33   | 64   | 33159 | 33179  | 41174 | 0.11  | 22.2 |          |
| metacrct_contigs-mgmt_unitig_0_quiver:c1:p1163070 | unitig_1_quiver83.33  | 18     | 3      | 0        | 4       | 21     | 33   | 55   | 28501 | 28518  | 41174 | 0.34  | 20.6 |          |
| metacrct_contigs-mgmt_unitig_0_quiver:c1:p1163130 | unitig_1_quiver81.82  | 22     | 4      | 0        | 12      | 33     | 33   | 82   | 3166  | 3145   | 41174 | 0.037 | 23.8 |          |
| metacrct_contigs-mgmt_unitig_0_quiver:c1:p1163130 | unitig_1_quiver84.21  | 19     | 3      | 0        | 7       | 25     | 33   | 82   | 9746  | 9728   | 41174 | 0.11  | 22.2 |          |
| metacrct_contigs-mgmt_unitig_0_quiver:c1:p1163130 | unitig_1_quiver100.00 | 12     | 0      | 0        | 9       | 20     | 33   | 82   | 22598 | 22609  | 41174 | 0.34  | 20.6 |          |
| metacrct_contigs-mgmt_unitig_0_quiver:c1:p1163190 | unitig_1_quiver93.33  | 15     | 1      | 0        | 17      | 31     | 33   | 48   | 29573 | 29587  | 41174 | 0.11  | 22.2 |          |
| metacrct_contigs-mgmt_unitig_0_quiver:c1:p1163190 | unitig_1_quiver93.33  | 15     | 1      | 0        | 18      | 32     | 33   | 48   | 34061 | 34075  | 41174 | 0.11  | 22.2 |          |
| metacrct_contigs-mgmt_unitig_0_quiver:c1:p1163250 | unitig_1_quiver85.00  | 20     | 3      | 0        | 1       | 20     | 33   | 82   | 10466 | 10485  | 41174 | 0.037 | 23.8 |          |
| metacrct_contigs-mgmt_unitig_0_quiver:c1:p1163250 | unitig_1_quiver100.00 | 13     | 0      | 0        | 15      | 27     | 33   | 82   | 16513 | 16501  | 41174 | 0.11  | 22.2 |          |
| metacrct_contigs-mgmt_unitig_0_quiver:c1:p1163250 | unitig_1_quiver92.86  | 14     | 1      | 0        | 14      | 27     | 33   | 82   | 28276 | 28289  | 41174 | 0.34  | 20.6 |          |

## VIRSorter

<https://github.com/simroux/VirSorter>

Prediction of viral sequences in unitq\_0 and unitq\_1:

```
## 3 - Complete phage contigs - category 3 (not so sure)
## Contig_id,Nb genes contigs,Fragment,Nb genes,Category,Nb phage hallmark genes,Phage gene enrichment sig,Non-Caudovirales phage gene enrichment sig,Pfam depletion sig,U
VIRSorter_unitig_1_quiver,47,VIRSorter_unitig_1_quiver,47,3,,gene_10-gene_47:12.33803784004104,gene_10-gene_47:5.09649532164305,,
ncharacterized enrichment sig,Strand switch depletion sig,Short genes enrichment sig

## 6 - Prophages - category 3 (not so sure)
## Contig_id,Nb genes contigs,Fragment,Nb genes,Category,Nb phage hallmark genes,Phage gene enrichment sig,Non-Caudovirales phage gene enrichment sig,Pfam depletion sig,U
VIRSorter_unitig_0_quiver,2517,VIRSorter_unitig_0_quiver-gene_1000-gene_1112,113,3,,gene_1000-gene_1099:27.39602990747906,gene_1056-gene_1112:5.88239235294574,,
ncharacterized enrichment sig,Strand switch depletion sig,Short genes enrichment sig
```

Potential prophage sequence in unitq\_0: 1044425-1148207

## Supplemental references

1. Darzentas N. 2010. Circoletto: Visualizing sequence similarity with Circos. *Bioinformatics* 26:2620–2621.
2. Cardenas JP, Lazcano M, Ossandon FJ, Corbett M, Holmes DS, Watkin E. 2014. Draft Genome Sequence of the Iron-Oxidizing Acidophile *Leptospirillum ferriphilum* Type Strain DSM 14647. *Genome Announc* 2:e01153-14-e01153-14.
3. Qi J, Wang B, Hao BI. 2004. Whole Proteome Prokaryote Phylogeny Without Sequence Alignment: A K-String Composition Approach. *J Mol Evol* 58:1–11.
4. Wang Y, Coleman-Derr D, Chen G, Gu YQ. 2015. OrthoVenn: A web server for genome wide comparison and annotation of orthologous clusters across multiple species. *Nucleic Acids Res* 43:W78–W84.
